1 **A cadherin mutation in *Celsr3* linked to Tourette Disorder affects dendritic**  
2 **patterning and excitability of cholinergic interneurons**

3  
4 Lauren A. Poppi<sup>2,3,4</sup>, K.T. Ho-Nguyen<sup>1,2</sup>, Junbing Wu<sup>1,2</sup>, Matthew Matrongolo<sup>1,2,3</sup>, Joshua K.  
5 Thackray<sup>3</sup>, Cara Nasello<sup>3</sup>, Anna Shi<sup>1,2</sup>, Matthew Ricci<sup>5</sup>, Nicolas L. Carayannopoulos<sup>1</sup>,  
6 Nithisha Cheedalla<sup>1</sup>, Julianne McGinnis<sup>1,2</sup>, Samantha Schaper<sup>2</sup>, Cynthia Daut<sup>1,2</sup>, Jurdiana  
7 Hernandez<sup>1</sup>, Gary A. Heiman<sup>2-4</sup>, Jay A. Tischfield<sup>2-4</sup>, Max A. Tischfield<sup>1,2,4\*</sup>

8  
9 <sup>1</sup>Department of Cell Biology and Neuroscience, Rutgers University, Piscataway, NJ 08854,  
10 USA.

11 <sup>2</sup>Child Health Institute of New Jersey, Robert Wood Johnson Medical School, New  
12 Brunswick, NJ 08901, USA

13 <sup>3</sup>Department of Genetics and the Human Genetics Institute of New Jersey, Rutgers, the  
14 State University of New Jersey, Piscataway, New Jersey, USA.

15 <sup>4</sup>Tourette International Collaborative Genetic Study (TIC Genetics)

16 <sup>5</sup>School of Computer Science and Engineering, The Hebrew University of Jerusalem,  
17 Jerusalem, Israel

18

19 **\*Corresponding author**

20 Max. A. Tischfield

21 Child Health Institute of New Jersey

22 Rutgers University, The State University of New Jersey

23 89 French St.

24 New Brunswick, NJ 08901

25 Ph: 732-235-9647

26 [max.tischfield@rutgers.edu](mailto:max.tischfield@rutgers.edu)

27

28 **Keywords**

29 Tourette, Celsr3, interneuron, sensorimotor, cortex, striatum

30

31 **Abstract**

32 *CELSR3* encodes an atypical protocadherin cell adhesion receptor that was recently identified  
33 as a high-risk gene for Tourette disorder. A putative damaging *de novo* variant was inserted  
34 into the mouse genome to generate an amino acid substitution within the fifth cadherin repeat.  
35 By contrast to *Celsr3* constitutive null animals, mice homozygous for the R774H amino acid  
36 substitution are viable and have grossly normal forebrain development. The density of cortical  
37 and striatal interneuron subpopulations is normal, but 3D geometric analysis of cortical  
38 pyramidal neurons and striatal cholinergic interneurons revealed changes to dendritic  
39 patterning and types and distributions of spines. Furthermore, patch clamp recordings in  
40 cholinergic interneurons located within the sensorimotor striatum uncovered mild intrinsic  
41 hyperexcitability. Despite these changes, *Celsr3*<sup>R774H</sup> homozygous mice do not show obvious  
42 'tic-like' stereotypies at baseline nor motor learning impairments, but females exhibited  
43 perseverative digging behavior. Our findings show that a human mutation in *CELSR3* linked  
44 to Tourette disorder is sufficient to alter dendritic patterning in the cortex and striatum and also  
45 the intrinsic excitability of cholinergic interneurons.

## 46 **Introduction**

47 Tourette Disorder (TD) is a childhood onset neurodevelopmental disorder associated with  
48 urges and unpleasant somatosensory phenomena, known as premonitory sensations, that  
49 serve to precipitate motor and vocal tics (Leckman et al., 2006). Although TD is traditionally  
50 classified as a movement disorder, it has common neuropsychiatric comorbidities including  
51 attention-deficit hyperactivity disorder (ADHD), obsessive compulsive disorder (OCD), and  
52 autism spectrum disorder (ASD), in addition to mood, anxiety, and sleep disorders (Hartmann  
53 and Worbe, 2018; Hirschtritt et al., 2015; Robertson, 2015; Willsey et al., 2018). TD is  
54 predicted to arise from structural and functional changes within cortico-striato-thalamo-cortical  
55 (CSTC) and basal ganglia networks that govern the planning, control, and execution of  
56 volitional motor behaviors (Draper and Jackson, 2015; Jackson et al., 2015; Kuo and Liu, 2019;  
57 Wang et al., 2011; Worbe et al., 2012).

58  
59 Magnetic resonance imaging studies have suggested an association between reduced  
60 caudate volume and TD (Gerard and Peterson, 2003; Peterson et al., 2003), while post-  
61 mortem findings from a small group of adults with severe, refractory TD showed a reduction  
62 in the numbers of parvalbumin and cholinergic interneurons in the dorsal striatum (Kalanithi  
63 et al., 2005; Kataoka et al., 2010). These findings have been widely referenced to explain the  
64 neuropathogenesis of TD (Rapanelli et al., 2017a), but efforts to model these findings have  
65 produced mixed results. Focal disinhibition of the dorsal sensorimotor striatum via application  
66 of GABA<sub>A</sub> receptor antagonists in rodents and non-human primates can trigger tic-like motor  
67 stereotypies (Bronfeld et al., 2013; McCairn et al., 2009; Worbe et al., 2009), whereas  
68 disinhibition in the ventral striatum leads to vocal tics (McCairn et al., 2016). Furthermore,  
69 targeted ablation of cholinergic interneurons in the rodent dorsal striatum can cause tic-like  
70 motor stereotypies following acute stress or amphetamine challenge (Xu et al., 2015), in  
71 addition to ritualistic and perseverative behaviors (Martos et al., 2017). While these animal  
72 models have provided valuable clues for understanding the pathogenesis of TD, they have  
73 notable limitations as the experimental manipulations were performed in adults, and thus they  
74 likely fail to model the types of neurodevelopmental changes found in humans.

75  
76 Preclinical animal models for TD are lacking, and no true genetic models have been developed  
77 apart from *Hdc* knockout mice, whose mutation does not correspond to the inactivating point  
78 mutation found in humans (Castellan Baldan et al., 2014). This is because despite the  
79 prevalence of TD (~0.5-1% of the population) (Scharf et al., 2015), gene coding variants have  
80 been identified in only a few families, and genome-wide association studies have yielded few  
81 clues. Recently, recurrent *de novo* coding variants in several genes, including *CELSR3*, *OPA1*,  
82 and *WWC1* have been identified using whole-exome sequencing (Willsey et al., 2017). Of the

83 identified candidates, *CELSR3* shows the strongest linkage to TD as ten different missense  
84 and/or inactivating point-mutations have been discovered to date in simplex trios and multiplex  
85 families, accounting for ~1% of clinical samples (Wang et al., 2018)(unpublished data).

86

87 *CELSR3* encodes a protocadherin cell adhesion G protein-coupled receptor that is critical for  
88 axon guidance and the development of white matter tracts that comprise CSTC circuitry (Tissir  
89 et al., 2005), and also the tangential migration of interneurons into the cortex and striatum  
90 (Ying et al., 2009). In adult animals, *Celsr3* expression is maintained in subpopulations of  
91 cortical and striatal interneurons, and also cerebellar Purkinje neurons (Ying et al., 2009).  
92 Thus, *Celsr3* expression patterns in the brain and its necessity for the development of CSTC  
93 and basal ganglia circuitry make it an attractive candidate to model TD in mice.

94

95 We have developed a genetic model for TD that expresses an analogous human amino acid  
96 substitution, R774H, within the fifth protocadherin repeat of the extracellular domain of *Celsr3*.  
97 To our knowledge, this represents the first genetic model for TD engineered to express the  
98 identical human mutation. Here, we investigate the impact of the *Celsr3*<sup>R774H</sup> amino acid  
99 substitution on brain development and mouse behavior. We hypothesized that *Celsr3*<sup>R774H</sup>  
100 mice would show perturbations to axon guidance, interneuron migration, and/or dendrite  
101 patterning. By contrast to human findings, we do not see evidence of cortical or striatal  
102 interneuron loss, and the development of major white matter tracts in the forebrain appears  
103 grossly normal. Rather, we find subtle perturbations to the structural and physiological  
104 properties of cortical and striatal neurons, including effects on dendritic patterning and  
105 membrane excitability. Using 3D pose analysis and Motion Sequencing, we do not detect overt  
106 tic-like stereotypies at baseline. Females homozygous for the R774H amino acid substitution,  
107 however, do show signs of preservative digging behavior. Our findings demonstrate that  
108 human mutations in *CELSR3* are sufficient to cause subtle but discernible changes to  
109 neuronal development and suggest the ability of neurons to functionally integrate into CSTC  
110 loops may be impaired in TD.

111

## 112 **Materials and methods**

### 113 Mouse lines

114 All experimental procedures were conducted in accordance with Rutgers Institutional Animal  
115 Care and Use Committee (IACUC) guidelines. Mice were group-housed in individually  
116 ventilated cages under a standard 12 h light/dark schedule, with controlled temperature and  
117 humidity, and *ad libitum* access to water and standard chow. Mouse lines used in this study  
118 are shown in Table S1. CRISPR/Cas9 was used within the Rutgers Gene Editing Shared  
119 Resource to produce an R774H amino acid substitution, which maps onto the fifth cadherin  
120 repeat (Fig. 1a) and corresponds to R783 in the human protein. The following single-stranded  
121 oligodeoxynucleotide template was used for targeted insertion via homology directed repair:  
122 [CAATCGGCCTGAGTTCACCATGAAAGAGTACCACCTTCGGCTCAATGAGGACGCAGCT  
123 GTAGGCACCAGTGTGGTCAGTGTGACTGCGGTAGATCACGATGCTAACAGCGCTATCA  
124 GCTACCAAATCACGGGTGGCAACACTCGGAACCGATTTGCCATC]. The following guide  
125 RNA was co-injected: [GGTAGTCGATGGTTTAGTGCCCA]. The targeted insertion added a  
126 restriction fragment length polymorphism that ablated a site recognized by Taq1 and 15 base  
127 pairs downstream of the targeted insertion. Chimeric mice were crossed with wild-type  
128 C57BL/6 animals and resulting heterozygous R774H mutant mice were backcrossed again  
129 with wild type C57BL/6 mice (Table S1) for at least three generations. The following Cre  
130 recombinase (*Drd1-Cre*, *A2a-Cre*, *Sst-Cre*, *Pvalb-Cre*) and reporter lines (*Celsr3-eGFP*, *Ai14*,  
131 *Chat-eGFP*, and *Pvalb-tdT*) were crossed with the *Celsr3*<sup>R774H</sup> line to generate double and  
132 triple transgenic lines. The *Celsr3-eGFP* knock-in mouse line was generously provided by Prof.  
133 Mario Capecchi, University of Utah, and Prof. Qiang Wu, Shanghai Jiao Tong University (Ying  
134 et al., 2009). Unless otherwise stated, all mice used in this study were young adults (P30-60).

135

### 136 Labelling of major axon tracts

137 P0 mouse pups (*Celsr3*<sup>+/+</sup> and *Celsr3*<sup>R774H/R774H</sup> littermates, both sexes) were sacrificed and  
138 brains were rapidly removed and drop fixed in 4% paraformaldehyde (PFA) in 0.1 M  
139 phosphate-buffered saline (PBS) for 48 hours at 4°C. Brains were then embedded in 3%  
140 agarose and sectioned on a Leica VT1200S vibratome at 110 µm. Matched sections were  
141 labelled in parallel using rat anti-L1 (1:500, Millipore) followed by goat anti-rat Alexa Fluor 546  
142 (1:000, Thermo Fisher). Image data were acquired on a Zeiss LSM700 confocal microscope  
143 using a 10X objective and a z-stack + tile approach. Side-by-side qualitative comparisons  
144 were made at several axial positions. Images were optimized for presentation using linear  
145 adjustments in Fiji (ImageJ).

146

### 147 Labelling of direct and indirect pathways

148 Mice (*Drd1-Cre/+; Celsr3<sup>+/+</sup>; Ai14/+*, *Drd1-Cre/+; Celsr3<sup>R774H/R774H</sup>; Ai14/+*, *A2a-Cre/+; Celsr3<sup>+/+</sup>;*  
149 *Ai14/+*, and *A2a-Cre/+; Celsr3<sup>R774H/R774H</sup>; Ai14/+*, both sexes) were deeply anaesthetized via  
150 intraperitoneal injection of ketamine and xylazine prior to transcardial perfusion with 0.1 M  
151 PBS followed by 4% PFA in 0.1 M PBS. Brains were post-fixed in 4% PFA overnight at 4°C  
152 prior to embedding in 3% agarose and sectioning on Leica VT1200S vibratome at 120 µm.  
153 Image data were acquired on a Leica M165FC stereomicroscope with CoolLED illumination.  
154 Images were optimized for presentation using linear adjustments in Fiji (ImageJ).

155

#### 156 *Nissl-B and mu-opioid receptor labelling*

157 Mice (*Celsr3<sup>+/+</sup>* and *Celsr3<sup>R774H/R774H</sup>*, both sexes) were deeply anaesthetized via  
158 intraperitoneal injection of ketamine and xylazine prior to transcardial perfusion with 0.1 M  
159 PBS followed by 4% PFA in 0.1 M PBS. Brains were post-fixed overnight at 4°C prior to  
160 incubation in 30% sucrose/0.1 M PBS solution for cryoprotection and sectioning on a Leica  
161 CM1950 cryostat at 40 µm. For Nissl-B staining, matched sections were labelled in parallel  
162 with NeuroTrace 435/455 Nissl (1:500, Invitrogen). For mu-opioid receptor labelling, matched  
163 sections were labelled in parallel with rabbit anti-µOR (1:1000, immunoStar) followed by  
164 donkey anti-rabbit Alexa Fluor 647 (1:500, Thermo Fisher). Image data were acquired using  
165 a 20X objective and z-stack tile approach on a Zeiss LSM700 confocal microscope, and  
166 qualitatively compared. Images were optimized for presentation using linear adjustments in  
167 Fiji (ImageJ).

168

#### 169 *Cortical layer markers*

170 Mice (*Celsr3<sup>+/+</sup>* and *Celsr3<sup>R774H/R774H</sup>*, both sexes) were deeply anaesthetized via  
171 intraperitoneal injection of ketamine and xylazine prior to transcardial perfusion with 0.1 M  
172 PBS followed by 4% PFA in 0.1 M PBS. Brains were post-fixed in 4% PFA overnight at 4°C  
173 prior to incubation in 30% sucrose/0.1 M PBS solution for cryoprotection and sectioning on a  
174 Leica CM1950 cryostat at 60 µm. Matched sections were labelled in parallel with mouse anti-  
175 *Satb2* (1:50, Abcam), rat anti-*Ctip2* (1:1000, Abcam), and rabbit anti-*Foxp2* (1:000, Abcam),  
176 followed by goat anti-mouse Alexa Fluor 546, goat anti-rat Alexa Fluor 488, and goat anti-  
177 rabbit Alexa Fluor 647 (all 1:1000, Thermo Fisher). Image data were acquired using a 20X  
178 objective and z-stack tile approach on a Zeiss LSM800 confocal microscope. Images were  
179 analysed offline in Imaris (Bitplane). Total cortical depth was measured in S1 cortex from the  
180 pial surface to the outer edge of the external capsule. Cortical layer thicknesses were  
181 measured along the same axis, guided by the fluorescent layer markers. Cortical layer  
182 thicknesses were calculated as a % of total cortical thickness. The *Spots* function was used  
183 within ROIs to determine the density and nearest neighbor distribution of labelled populations  
184 within each defined cortical layer. *Spots* data were exported into Excel (Microsoft) for further

185 analysis. Graphing and statistical testing were done in Graphpad Prism 9. Images were  
186 optimized for presentation using linear adjustments in Fiji (ImageJ).

187

### 188 Interneuron counting

189 Mice (*Celsr3*<sup>+/+</sup>, *Celsr3*<sup>R774H/R774H</sup>, *Sst-Cre/+;Celsr3*<sup>+/+;Ai14/+</sup>, *Sst-*  
190 *Cre/+;Celsr3*<sup>R774H/R774H;Ai14/+</sup>, *Celsr3*<sup>+/+;Chat-eGFP</sup> and *Celsr3*<sup>R774H/R774H;Chat-eGFP</sup>, both  
191 sexes) were deeply anaesthetized via intraperitoneal injection of ketamine and xylazine prior  
192 to transcardial perfusion with warm 0.1 M PBS followed by 4% PFA in 0.1 M PBS. Brains were  
193 post-fixed overnight at 4°C prior to embedding in 3% agarose and sectioning on a Leica  
194 VT1200S vibratome at either 60 µm (for parvalbumin and somatostatin interneuron counts) or  
195 120 µm (for cholinergic interneuron counts). For parvalbumin interneuron counts (in *Celsr3*<sup>+/+</sup>  
196 and *Celsr3*<sup>R774H/R774H</sup> mice), matched sections were labelled in parallel using goat anti-  
197 parvalbumin (PV) (1:1000, Swant) followed by donkey anti-goat Alexa Fluor 488 (1:1000,  
198 Thermo Fisher). For somatostatin interneuron counts (In *Sst-Cre/+; Celsr3*<sup>+/+; Ai14/+</sup> and *Sst-*  
199 *Cre/+; Celsr3*<sup>R774H/R774H; Ai14/+</sup> mice), matched sections were labelled in parallel using rabbit  
200 anti-RFP (1:1000, Rockland) followed by donkey anti-rabbit Alexa Fluor 546 (1:1000, Thermo  
201 Fisher). For cholinergic interneuron counts, matched sections were labelled in parallel using  
202 chicken anti-GFP (1:500, Aves Labs) and goat anti-choline acetyltransferase (ChAT) (1:200,  
203 Millipore) followed by donkey anti-chicken Alexa Fluor 488 and donkey anti-goat Alexa Fluor  
204 546 (both 1:1000, Thermo Fisher). Image data were acquired using a 20X objective and z-  
205 stack tile approach with a maximum step size of 2 µm on a Zeiss LSM 700 confocal  
206 microscope. Images were analysed offline and blinded to genotype in Fiji (Image J).  
207 Interneuron counts were quantitatively compared at 4 predefined antero-posterior axis  
208 positions relative to bregma: position 1 (1.53 to 0.85 mm), position 2 (0.85 to 0.13 mm),  
209 position 3 (0.13 to -0.59 mm), and position 4 (-0.59 to -1.31 mm) (Franklin and Paxinos, 2012).  
210 Graphing and statistical testing were done in Graphpad Prism 9.

211

### 212 Viral sparse cell labeling

213 Mice were anesthetized with 1-3 % vaporized isoflurane in oxygen (1 L/min) and placed on a  
214 stereotaxic frame. *Pvalb-Cre/+; Celsr3*<sup>R774H/R774H</sup> animals and *Pvalb-Cre/+; Celsr3*<sup>+/+</sup> littermate  
215 control animals were injected with a cocktail of 2 adenoviruses (AAV9-TRE-DIO-vCre and  
216 AAV9-TRE-vDIO-GFP-tTA) diluted in sterile saline (1:1:18 ratio of AAV9-TRE-DIO-vCre to  
217 AAV9-TRE-vDIO-GFP-tTA to 0.9% NaCl) bilaterally into S1 (+/- 1.80 ML, 0.00 AP, -1.75DV ;  
218 500 nL each injection at a rate of 100 nL/min). This sparse labelling system, provided by Dr.  
219 Minmin Luo, Tsinghua University, consists of a controller vector that contains a Tetracycline  
220 Response Element promoter (TRE) and a Cre-dependent expression cassette (double-floxed  
221 inverse open reading frame) encoding a mutated Cre-recombinase (vCre) that only recognizes

222 vLoxP sites (Lin et al., 2018). The amplifier vector contains a vCre-dependent expression  
223 cassette encoding membrane-anchored GFP (mGFP) and the tetracycline-controlled  
224 transactivator (tTA) downstream of an internal ribosome entry site. When these viruses are  
225 injected into mice that express Cre-recombinase, vCre is flipped into the correct reading frame.  
226 vCre can then flip the amplifier expression cassette into the correct orientation, resulting in  
227 GFP and tTA expression. Under basal conditions, the TRE promoter is “leaky” and provides  
228 very low levels of vCre expression, and only a few neurons will produce enough vCre to flip  
229 the amplifier expression cassette into the right orientation. In these sparsely populated  
230 neurons, tTA can bind to the TRE promoter on both the control and amplifier vectors, boosting  
231 mGFP expression in a positive feedback loop. Following surgery, buprenorphine SR (1.5  
232 mg/kg), carprofen (5 mg/kg) and sterile saline were administered for 3 days post-surgery and  
233 the health and welfare of mice were closely monitored. 3 weeks post-surgery, mice were  
234 transcardially perfused as described above.

235

### 236 Anatomical recovery of cortical pyramidal neurons

237 Fixed brains were embedded in 3% agarose blocks and sectioned on a Leica VT1000  
238 vibratome at 110  $\mu\text{m}$ . mGFP signal was amplified by incubating in chicken anti-GFP (1:500,  
239 Aves Labs) followed by goat anti-chicken Alexa Fluor 488 (1:1000, Thermo Fisher). mGFP  
240 expressing cells were imaged on a Leica LSM700 confocal microscope at 20X using a z-stack  
241 tile approach with maximum z-steps of 1  $\mu\text{m}$ . For spine counts, secondary dendrites were  
242 imaged on a Leica LSM800 confocal microscope using a 63X oil immersion lens with minimum  
243 z-step distance (0.46  $\mu\text{m}$ ) and post-hoc deconvolution. z-stack tile images were imported into  
244 Imaris (RRID:SCR\_007370) and neurites were semi-automatically traced using the autodepth  
245 feature in *Filaments*. Tracing was performed independently by two different experimenters and  
246 blinded to mouse genotype. Soma were rendered using *Surfaces* for illustration purposes only.  
247 Spines were detected semiautomatically, and diameters were recomputed using the shortest  
248 distance from distance map algorithm. Spines were classified into 4 distinguished classes:  
249 stubby, mushroom, long thin, and filopodia using the *ClassifySpines* Xtension and specified  
250 criteria (Table S2). All *Filaments* and *ClassifySpines* data were exported into Excel for further  
251 analysis, and graphic and statistical testing were done in GraphPad Prism 9  
252 (RRID:SCR\_002798).

253

### 254 Electrophysiology

255 Mice (*Celsr3*<sup>+/+</sup>; *Chat-eGFP* and *Celsr3*<sup>R774H/R774H</sup>; *Chat-eGFP*, both sexes) were anesthetized  
256 with an intraperitoneal injection of ketamine + xylazine prior to rapid decapitation and brain  
257 dissection (de Oliveira et al., 2010). Coronal 300  $\mu\text{m}$  sections were taken on a Leica VT1200S  
258 vibratome in ice-cold sucrose substituted cerebrospinal fluid (aCSF) containing (in mM): 250



259 sucrose, 25 NaHCO<sub>3</sub>, 10 glucose, 2.5 KCl, 1 NaH<sub>2</sub>PO<sub>4</sub>, 1 MgCl and 2.5 CaCl<sub>2</sub>. Ringers'  
260 solutions were continually bubbled with 95% O<sub>2</sub> / 5% CO<sub>2</sub> to maintain oxygenation and neutral  
261 pH. Sections were allowed to recover for 1 hour at room temperature in normal aCSF  
262 (118 mM NaCl substituted for sucrose) prior to recording. aCSF was continually bubbled with  
263 95% O<sub>2</sub> / 5% CO<sub>2</sub>. Evoked action potential characterization was done using a potassium  
264 gluconate based internal solution containing (in mM): 135 K.gluconate, 8 NaCl, 10 HEPES,  
265 0.1 EGTA, 0.3 Na<sub>3</sub>GTP, and 2 Mg<sub>2</sub>ATP. Biotin hydrobromide (0.2%, Biotium) was added to  
266 the internal solution. Data were amplified using a Multiclamp 200B amplifier, digitized using a  
267 Digidata 1550A, and acquired using pClamp11 (Molecular Devices, RRID:SCR\_011323).  
268 Series resistance (R<sub>s</sub>), membrane resistance (R<sub>m</sub>), membrane capacitance (C<sub>m</sub>), and resting  
269 membrane potential (RMP) were measured at the beginning of recording and monitored  
270 throughout. Evoked AP characteristics were recorded within 1 min of membrane breakthrough.  
271 Bridge balances were applied in current clamp mode. Voltages have not been corrected for  
272 liquid junction potential. Cholinergic interneurons in the dorsolateral striatum were  
273 fluorescence targeted via their expression of eGFP, and their identities were confirmed  
274 physiologically via relatively depolarized RMPs (~ -55mV), prominent voltage sag, slow AHP  
275 currents, and relatively wide action potential waveforms. AP threshold was measured using  
276 the first derivative of the AP and was defined as the voltage at which dV/dt = 10 mV.s<sup>-1</sup>. Data  
277 were excluded from analysis if R<sub>s</sub> > 30 MOhm or if ΔR<sub>s</sub> > 20% over the course of the recording.  
278 Electrophysiology data were analyzed offline in Axograph X (Axograph, Sydney,  
279 RRID:SCR\_014284). At the end of recording, slices were dropped into 4% PFA for post-hoc  
280 anatomical recovery. Slices were kept in 4% PFA overnight at 4°C, washed in 0.1 M PBS,  
281 then stored in 0.1 M PBS + 5 mM NaN<sub>3</sub> at 4°C until further processing.

282

### 283 Anatomical recovery of striatal cholinergic interneurons

284 Slices were incubated in in Alexa-546 conjugated streptavidin (1:50, Thermo Fisher) for 2  
285 hours at room temperature. Slices were then mounted onto slides in Fluoromount-G (Southern  
286 Biotech). Biotin-filled and fluorescently tagged cholinergic interneurons were imaged on a  
287 Zeiss LSM700 confocal microscope using a 63X Apo-plan oil immersion lens and a z-stack +  
288 tile approach. Labelled cell somata were checked for eGFP expression to confirm cholinergic  
289 identity. Step size was set to minimum (0.46 μm). Raw .czi data were converted and imported  
290 into Imaris (Bitplane) and neurites were traced using *Filaments* as described above. Soma  
291 volumes were rendered for presentation purposes using *Surfaces*, but due to potential  
292 perturbation from recording, soma sizes were not compared. Spines were also measured on  
293 ROI images using *ClassifySpines*, as described above. Fractal dimension (D<sub>B</sub>) and lacunarity  
294 of cholinergic interneuron neurites were measured using the FracLac ImageJ plugin  
295 (<http://rsb.info.nih.gov/ij/plugins/fractalac/FLHelp/Introduction.htm>). Data were exported from

296 Imaris and ImageJ to excel for further analysis, and graphing and statistical testing were done  
297 in Graphpad Prism9.

298

### 299 Marble burying assay

300 Mice (*Celsr3*<sup>+/+</sup> and *Celsr3*<sup>R774H/R774H</sup>, both sexes) were gently placed into a rectangular arena  
301 with a 5 cm base of Beta Chip bedding (Northeastern Products), where 20 glass marbles had  
302 been placed on top of the bedding in a 4 x 5 grid pattern. After 30 minutes, the mouse was  
303 returned to their home cage and the number of marbles buried were counted. A marble was  
304 counted as ‘buried’ if it was buried 50% or more. This assay was repeated over three  
305 consecutive days and the number of marbles buried across the three trials was averaged for  
306 each animal.

307

### 308 3D depth imaging and pose analysis

309 Data was acquired and processed as previously described (Bohic et al., 2021). For motion  
310 sequencing image data acquisition, mice were gently placed into a 17” diameter cylindrical  
311 enclosure with 17”-high walls (US Plastics) and allowed to roam freely for 20 minutes while  
312 being recorded with a Kinect2 depth-sensing camera (Microsoft). Depth data were modelled  
313 as described previously (Wiltschko et al., 2015). Raw depth frames were collected at 30 Hz  
314 using custom C# code. Frames were 512 x 424 pixels and each pixel carried a 16-bit integer  
315 value denoting the distance from the sensor in mm. Frames were compressed and analyzed  
316 offline. Briefly, the mouse’s center and orientation were determined using an ellipse fit. Then,  
317 an 80 x 80 pixel box was drawn around the mouse, and the mouse was rotated to face the  
318 right hand side. Next, if the tracking model was used, missing pixels were identified by their  
319 likelihood according to the Gaussian model. Low-likelihood pixels were treated as missing  
320 data and principal components (PCs) are computed using probabilistic PCA (Roweis, 1998;  
321 Tipping and Bishop, 1999). Finally, frames were projected onto the first 10 PCs, forming a 10-  
322 dimensional time series that described the mouse’s 3D pose trajectory. These data were used  
323 to train an autoregressive hidden Markov model (AR HMM) with 3 lags to cluster mouse  
324 behavioral dynamics into discrete ‘modules’ with state number automatically identified using  
325 a hierarchical Dirichlet process. Each state was comprised of a vector autoregressive process  
326 that captures the evolution of the 10 PCs over time. The model was fit using Gibbs sampling  
327 as described in Wiltschko et al. (2015) using freely available software  
328 (<https://github.com/mattjj/pybasicbayes>). Model output was insensitive to all but two  
329 hyperparameters, which were set using unsupervised techniques for determining the length  
330 scales for discrete behaviors as was previously published (Wiltschko et al., 2015).

331 **Results**

332 Gross phenotypic presentation of *Celsr3*<sup>R774H</sup> mice

333 *Celsr3*<sup>R774H/+</sup> and *Celsr3*<sup>R774H/R774H</sup> animals on a pure C57BL/6 background were born at normal  
334 Mendelian ratios, had normal weights, and were indistinguishable by eye from littermate  
335 controls. By contrast, *Celsr3* constitutive null animals are perinatal lethal, suggesting the  
336 *Celsr3*<sup>R774H</sup> mutant protein still retains key functions. No obvious tics or motor stereotypies  
337 were apparent at baseline by eye, and there were no signs of hair loss or skin lesions indicative  
338 of compulsive grooming behavior. We focused our remaining investigation on animals that  
339 were homozygous for the amino acid substitution.

340

341 Axon tract development is grossly normal in *Celsr3*<sup>R774H</sup> mice

342 *Celsr3* is required for the development and guidance of major forebrain axon tracts, such as  
343 the anterior commissure and internal capsule, which contains corticostriatal, thalamocortical,  
344 and corticothalamic axons. Gross anatomy and overall size of *Celsr3*<sup>R774H/R774H</sup> mouse brains  
345 appeared normal. Antibody labelling against neuronal cell adhesion protein L1 in embryonic  
346 day (E)18.5 brain sections showed that the development and trajectories of major forebrain  
347 axon tracts in the internal capsule, anterior commissure, and corpus callosum were normal in  
348 *Celsr3*<sup>R774H/R774H</sup> animals (Fig. 1C). *Celsr3* is also required for the development of key basal  
349 ganglia pathways, including axonal projections from areas such as the striatum, subthalamic  
350 nucleus, and the substantia nigra pars compacta to the globus pallidus (Jia et al., 2014).  
351 Striatonigral axons in the direct pathway terminating in the globus pallidus internus (GPi) and  
352 substantia nigra (SNr) were visualized by crossing *Drd1a-Cre* and *R26: Ai14* reporter lines  
353 (Table S1). Striatonigral fiber tracts showed normal development in adult *Drd1a-*  
354 *Cre;Celsr3*<sup>R774H/R774H</sup>; *R26: Ai14* mice and terminated appropriately in the GPi (n = 3, Fig. 1D).  
355 Next, we crossed *A2a-Cre* and *R26: Ai14* reporter lines (Table S1) to visualize striatopallidal  
356 axons that terminate in the globus pallidus externus (GPe). We did not detect any qualitative  
357 differences in the pattern of tdTomato-positive fibers terminating in the GPe of *Drd1a-*  
358 *Cre;Celsr3*<sup>R774H/R774H</sup>; *R26: Ai14* animals (n = 4) compared to littermate controls (n = 3, Fig. 1D).  
359 We also did not observe instances of wandering axons or misinnervation by direct and indirect  
360 pathway axons. Overall cellular organization within the cortex and subcortical structures was  
361 comparable between *Celsr3*<sup>+/+</sup> (n = 2) and *Celsr3*<sup>R774H/R774H</sup> mice (n = 2) based on Nissl-B  
362 staining (Fig. 1E). In the striatum, the formation of the matrix and striosome compartments  
363 also appeared normal in *Celsr3*<sup>R774H/R774H</sup> animals according to the pattern of mu-opioid  
364 receptor labelling (n = 2, Fig. 1E). Thus, this *Celsr3*<sup>R774H</sup> amino acid substitution within the fifth  
365 cadherin repeat does not affect the ability of the protein to regulate axon guidance in the  
366 forebrain in a manner that is detectable with the qualitative anatomical techniques used.

367

368 *Celsr3*<sup>R774H</sup> mice have organized cortical layering and do not show interneuron loss

369 Cortical layering, as assessed by TBR1, CTIP2, and SATB2 immunostaining, was normal in  
370 *Celsr3*<sup>R774H/R774H</sup> animals (n = 3) compared to littermate controls (n = 3, Fig. 2A). The relative  
371 radial thickness of each cortical layer was also normal in *Celsr3*<sup>R774H/R774H</sup> animals (n = 3, Fig.  
372 2B, p = 0.9742, Chi-square test), and nearest neighbor analysis showed normal distribution of  
373 labelled cortical neurons (Fig. 2B, p = 0.2275, 2way ANOVA). *Celsr3* is expressed by E13.5  
374 in the ganglionic eminences, which give rise to cortical and striatal interneurons, and has been  
375 reported to regulate the tangential migration of cortical interneurons (Ying et al., 2009).  
376 Immunolabeling against parvalbumin showed the density of cortical parvalbumin interneurons  
377 was normal in *Celsr3*<sup>R774H/R774H</sup> mice (Fig. 2D). Using *somatostatin-Cre* and the *R26: Ai14*  
378 reporter line to lineage label somatostatin interneurons, there were also no differences in the  
379 density of these interneurons in the cortex of *Celsr3*<sup>R774H/R774H</sup> mice (Fig. 2F). Thus, cell  
380 proliferation and the radial and tangential migration of cortical pyramidal neurons and  
381 interneurons, respectively, was unaffected in *Celsr3*<sup>R774H/R774H</sup> animals.

382

383 *Cortical pyramidal neuron dendritic patterning is affected in Celsr3*<sup>R774H/R774H</sup> mice

384 We examined *Celsr3* expression in the cortex using a green fluorescent protein (GFP) knock-  
385 in reporter line (*Celsr3*<sup>GFP</sup>) that faithfully recapitulates its endogenous expression patterns  
386 (Ying et al., 2009). GFP labelling shows expression is maintained in subsets of parvalbumin  
387 interneurons in juvenile and adults (Fig. 2C). *Celsr3* is required for neurite development and  
388 dendritic patterning in cortical pyramidal and hippocampal CA1 neurons (Feng et al., 2012;  
389 Zhou et al., 2010), so we examined whether the dendritic arborizations of cortical parvalbumin  
390 interneurons were properly patterned in *Celsr3*<sup>R774H/R774H</sup> mice using a Cre-dependent viral  
391 sparse cell labelling approach to mark parvalbumin (PV) interneurons with GFP (Lin et al.,  
392 2018). We crossed a *PV-2A-Cre* allele onto the *Celsr3*<sup>R774H/R774H</sup> background and injected the  
393 virus into the somatosensory cortex. Most labelled neurons were located in deep layer 5 of  
394 the cortex but surprisingly, most were not positive for parvalbumin immunostaining. Instead,  
395 these neurons had typical cortical pyramidal neuron morphology with basal and long apical  
396 dendrites. Crossing these animals to the *R26: Ai14* reporter line showed diffuse td-Tomato  
397 expression throughout the cortex, suggesting the *PV-2A-Cre* allele went germline, consistent  
398 with previous reports (Luo et al., 2020). Nonetheless, 3D neuronal reconstructions revealed  
399 that the basal dendrites of *Celsr3*<sup>R774H/R774H</sup> deep layer 5 pyramidal neurons were less  
400 arborized than littermate controls (Fig. 3B). Basal dendrites were also analyzed separately by  
401 excluding apical branches from the dataset (Fig. 3C). Sholl analysis revealed a genotype  
402 effect for the complexity of *Celsr3*<sup>R774H/R774H</sup> pyramidal neuron basal dendrites (Fig. 3D;  
403 *Celsr3*<sup>+/+</sup> n = 6; *Celsr3*<sup>R774H/R774H</sup> n = 8; two-way ANOVA genotype effect p < 0.001). The area  
404 under the Sholl curve was 1639 +/- 40.05 and 1204 +/- 27.62 for *Celsr3*<sup>+/+</sup> and *Celsr3*<sup>R774H/R774H</sup>,

405 respectively. There was also a significant genotype effect when comparing branch depth,  
406 which reflects the number of times a dendrite has branched since leaving the soma, with total  
407 length (Fig. 3E;  $p = 0.0271$ , two-way ANOVA). There was no significant difference in the  
408 number of branch points ( $Celsr3^{+/+} = 16.33 \pm 2.81$ ,  $Celsr3^{R774H/R774H} = 15.22 \pm 1.52$ ,  $p =$   
409  $0.7110$ , unpaired t test) or dendritic straightness ( $Celsr3^{+/+} = 0.9411 \pm 0.003$ ,  $Celsr3^{R774H/R774H}$   
410  $= 0.9298 \pm 0.006$ ,  $p = 0.1805$ , unpaired t test). We also did not see evidence of increased  
411 number of self-crossings. There was no difference in the density of spines along the secondary  
412 basal dendrites between  $Celsr3^{+/+}$  ( $8.60 / 10 \mu\text{m}$ ) and  $Celsr3^{R774H/R774H}$  ( $8.94 / 10 \mu\text{m}$ ). However,  
413 when spines were classified according to morphology (e.g. stubby, mushroom, long-thin,  
414 filopodia), and the relative densities were compared using the *ClassifySpines* IMARIS plug-in,  
415 the proportion of stubby and long-thin spines detected along a single length of dendrite  
416 appeared shifted in  $Celsr3^{R774H/R774H}$  mice (Fig. 3G). There was also a significant reduction in  
417 stubby spines in  $Celsr3^{R774H/R774H}$  animals ( $p = 0.033$ ), and a trend toward an increase in long  
418 thin spines ( $p = 0.055$ , t-tests with multiple comparison correction). Thus, the  $Celsr3^{R774H}$  amino  
419 acid substitution is sufficient to alter dendritic patterning and the types and distributions of  
420 spines in deep layer cortical pyramidal neurons.

421

#### 422 Disorganization of striatal cholinergic interneuron neurite patterning

423 We examined neurite patterning of single striatal cholinergic interneurons using biotin filling  
424 during recording and post-hoc anatomical recovery.  $Celsr3^{R774H/R774H}$  ( $n = 13$ ) cholinergic  
425 interneurons showed increased neurite complexity compared to  $Celsr3^{+/+}$  cholinergic  
426 interneurons ( $n = 6$ ,  $p < 0.001$ , 2way ANOVA, Fig. 5b). The area under the curve values for  
427 cholinergic interneuron Sholl plots were  $2709 \pm 44.2$  and  $3165 \pm 41.1$ , for  $Celsr3^{+/+}$  and  
428  $Celsr3^{R774H/R774H}$ , respectively, and each dataset fell outside the 95% confidence interval of the  
429 opposing genotype. Data presented in heatmap form allowed for alternative visualization of  
430 relative complexity of neurites with increasing distance from the soma, and  $Celsr3^{R774H/R774H}$   
431 neurites appear to be more compact on average (Fig. 5c). The number of branch points  
432 trended towards a significant increase in  $Celsr3^{R774H/R774H}$  cholinergic interneurons ( $p = 0.06$ ,  
433 t-test, Fig. 5d), and neurite straightness trended towards a significant decrease in  
434  $Celsr3^{R774H/R774H}$  cholinergic interneurons ( $p = 0.05$ , t-test, Fig. 5e). As these results may not  
435 have fully explained either the Sholl effect or the striking visual appearance of  $Celsr3^{R774H/R774H}$   
436 cholinergic interneurons, we analysed the fractal geometry and lacunarity of their neurite  
437 patterns in 2D. While fractal dimension ( $D_B$ ) was similar in  $Celsr3^{+/+}$  and  $Celsr3^{R774H/R774H}$   
438 cholinergic interneurons ( $p = 0.2636$ , Mann-Whitney test), lacunarity was significantly  
439 increased in  $Celsr3^{R774H/R774H}$  compared to controls ( $p = 0.0379$ , t- test).

440

#### 441 Striatal cholinergic interneuron physiology

442 Dorsolateral striatal cholinergic interneurons of both *Celsr3*<sup>+/+</sup> and *Celsr3*<sup>R774H/R774H</sup> mice had  
443 characteristically large somata, and upon membrane breakthrough, had a relatively  
444 depolarized resting membrane potential (RMP). Passive membrane properties were not  
445 significantly different between *Celsr3*<sup>+/+</sup> and *Celsr3*<sup>R774H/R774H</sup> mice. Membrane impedance ( $R_m$ )  
446 was 184.8 +/- 8.82 MOhm and 205.1 +/- 11.89 MOhm for *Celsr3*<sup>+/+</sup> (n = 31) and  
447 *Celsr3*<sup>R774H/R774H</sup> (n = 39) cholinergic interneurons, respectively (p = 0.4238, Mann-Whitney  
448 test). Membrane capacitance ( $C_m$ ) was 33.52 +/- 1.10 pF and 34.05 +/- 0.97 pF for *Celsr3*<sup>+/+</sup>  
449 and *Celsr3*<sup>R774H/R774H</sup> cholinergic interneurons, respectively (p = 0.7214, t-test). Membrane time  
450 constant ( $\tau$ ) was 2.88 +/- 0.16 ms and 2.91 +/- 0.16 ms for *Celsr3*<sup>+/+</sup> and *Celsr3*<sup>R774H/R774H</sup>  
451 cholinergic interneurons, respectively (p = 0.8870, t-test). Resting membrane potential (RMP)  
452 was on average more depolarized in *Celsr3*<sup>R774H/R774H</sup> cholinergic interneurons (p = 0.037, t-  
453 test, Fig. 6b). Rheobase (minimum current injection step required to elicit an action potential)  
454 was not significantly affected (p = 0.3505, Mann-Whitney test, Fig. 6e). The action potential  
455 (AP) threshold was significantly more depolarized in *Celsr3*<sup>R774H/R774H</sup> cholinergic interneurons  
456 (p = 0.0456, t-test, Fig. 6f). The f/I plots for *Celsr3*<sup>+/+</sup> (n = 29) and *Celsr3*<sup>R774H/R774H</sup> (n = 25)  
457 required different nonlinear fits (p < 0.001, Fig. 6g). This indicated a tendency for  
458 *Celsr3*<sup>R774H/R774H</sup> cholinergic interneurons to fire at a higher frequency in response to somatic  
459 current injection compared with *Celsr3*<sup>+/+</sup> cholinergic interneurons. AP frequency was  
460 significantly higher in *Celsr3*<sup>R774H/R774H</sup> compared to *Celsr3*<sup>+/+</sup> cholinergic interneurons with 200  
461 pA current injection (p = 0.038, t-test, Fig. 6g). Thus, *Celsr3*<sup>R774H</sup> is sufficient to alter the  
462 membrane properties of cholinergic interneurons.

463

#### 464 *Celsr3*<sup>R774H/R774H</sup> female mice show preservative digging behavior

465 The *Celsr3*<sup>R774H</sup> variant is reported in an individual with TD and comorbid ADHD. We assessed  
466 activity levels in SmartCages in mixed sex cohorts using infrared beam breaks.  
467 *Celsr3*<sup>R774H/R774H</sup> mice did not show an increase in overall activity compared to littermate  
468 controls (Extended Data 1, p = 0.6249, 2way ANOVA). *Celsr3*<sup>R774H/R774H</sup> mice were trending  
469 towards a significant increase in the number of vertical rears (upper IR beam break) compared  
470 to controls (Extended Data 1, p = 0.0717, 2way ANOVA). *Celsr3*<sup>R774H/R774H</sup> mice showed  
471 normal latency (p = 0.6300, 2way ANOVA) and speed progression (p = 0.6760, 2way ANOVA)  
472 on an accelerated rotarod, suggesting motor coordination and learning is intact in these  
473 animals (Extended Data 1). We examined perseverative behaviors using the marble burying  
474 assay, *i.e.* counting the number of marbles buried within a 30 minute span (see schematic Fig.  
475 6A). Male *Celsr3*<sup>+/+</sup> mice (n = 11) buried a similar number of marbles (14.30 +/- 1.00) to  
476 *Celsr3*<sup>R774H/R774H</sup> mice (n = 8, 14.59 +/- 1.10, p = 0.8504, two-tailed t test). However, female  
477 *Celsr3*<sup>R774H/R774H</sup> mice (n = 11) buried a significantly higher number of marbles on average

478 (16.66 +/- 0.64) compared to littermate *Celsr3*<sup>+/+</sup> controls (n = 13, 13.92 +/- 0.72, p = 0.0105;  
479 two-tailed t test, Fig. 6B).

480

481 *Celsr3*<sup>R774H</sup>-mutant mice do not show tic-like stereotypies at baseline

482 To determine whether *Celsr3*<sup>R774H/R774H</sup> mice exhibit motor stereotypies, we used Motion  
483 Sequencing to analyze motor behavior while animals explored an open field (circular diameter  
484 17 inches, Fig. 6c) for 20 minutes (Bohic et al., 2021; Wiltshcko et al., 2015). MoSeq can learn  
485 to identify stereotyped motor modules (e.g. rear, groom, scrunch) and calculate the usage  
486 frequencies, as well as transition probabilities, that determine how these modules are  
487 assembled into short motion sequences. Single module usage frequencies were not  
488 significantly different between *Celsr3*<sup>+/+</sup> and *Celsr3*<sup>R774H/R477H</sup> mice after strict multiple  
489 correction testing (Fig. 6e). We saw numerous, albeit subtle, changes to first order transition  
490 probabilities that link motor modules together, but action selection did not appear to be  
491 appreciably affected according to the overall rate of entropy (Extended Data 3) (Markowitz et  
492 al., 2018). Next, we used computational methods based on natural language processing to  
493 examine how these short sequences were grouped into larger embeddings (Bohic et al., 2021).  
494 Interestingly, this method showed that *Celsr3*<sup>R774H</sup> animals could be distinguished from  
495 littermate controls with an accuracy rate of 81%, which was greater than what was seen  
496 according to module usages or first order transition probabilities alone. Thus, this data  
497 suggests that *Celsr3*<sup>R774H</sup> animals do have subtle changes to motor behavior that are reflected  
498 by how short sequences are embedded into larger action sequences over longer timescales  
499 based on higher order transition probabilities. Finally, we used depth imaging data to calculate  
500 time spent in the center versus the periphery of the circular open field. We did not detect any  
501 significant changes to the amount of time spent in the center, suggestion that overall levels of  
502 anxiety were unaffected in *Celsr3*<sup>R774H</sup> animals (Extended Data 4).

## 503 Discussion

504 We present a phenotypic analysis of a mouse model for Tourette Disorder engineered to  
505 express a putative damaging variant in *Celsr3* that causes an amino acid substitution within  
506 the fifth extracellular cadherin repeat. To our knowledge, this is the first model for Tourette  
507 Disorder that expresses the identical human mutation. Putative damaging variants in *Celsr3*  
508 identified to date include missense mutations and a frameshift that leads to a stop-gain in the  
509 second laminin-G like domain (Wang et al., 2018). The latter suggests TD associated variants  
510 in *Celsr3* exert loss-of-function effects on the protein. By contrast with *Celsr3* constitutive null  
511 animals that die at birth (Tissir et al., 2005), animals homozygous for the *Celsr3*<sup>R774H</sup> amino  
512 acid substitution were viable and fertile. This suggests the mutation may exert only mild, partial  
513 loss-of-function effects on the protein, although gain-of-function effects may be possible as  
514 well.

515  
516 Constitutive loss of *Celsr3* affects axon guidance and the development of white matter tracts  
517 in the internal capsule, including corticostriatal, corticothalamic, and thalamocortical fibers that  
518 comprise CSTC pathways (Tissir et al., 2005; Zhou et al., 2008). While *Celsr3* is required cell  
519 autonomously for corticospinal and corticostriatal axon pathfinding, is thought to guide  
520 thalamocortical and corticothalamic axons in a non-cell autonomous manner via its activity in  
521 guidepost neurons (Zhou et al., 2008). In addition, *Celsr3* is required for the formation of axon  
522 tracts within basal ganglia circuits (Jia et al., 2014). By contrast with *Celsr3* constitutive null  
523 animals, the *Celsr3*<sup>R774H</sup> amino acid substitution modelled in the present study does not cause  
524 appreciable misrouting of axons (Fig. 1). More subtle changes to the abilities of axons to  
525 terminally branch and/or synapse appropriately onto neurons may be present and functionally  
526 significant and will need to be investigated further.

527  
528 *Celsr3* is expressed by ~E14.5 in the mouse ganglionic eminences, which produce cortical  
529 and striatal interneurons (Tissir and Goffinet, 2006). The role of *Celsr3* in the tangential  
530 migration of interneurons from the preganglionic eminences has been debated (Feng et al.,  
531 2012). Constitutive loss of protein function in homozygous *Celsr3*<sup>GFP</sup> knock-in mice is reported  
532 to affect tangential interneuron migration (Ying et al., 2009). Cortical interneuron loss is  
533 reported in these animals as tangentially migrating calretinin-expressing interneurons appear  
534 to become trapped at the boundary between the cortex and the striatum. An increase of  
535 calretinin expressing interneurons was reported in the striatum, and they were abnormally  
536 distributed compared to control animals (Ying et al., 2009). Reports of *Celsr3*-mediated  
537 alterations in interneuron migration are intriguing in light of findings from post-mortem brains  
538 of adults with severe TD that showed loss of striatal parvalbumin and cholinergic interneurons



539 (Kalanithi et al., 2005; Kataoka et al., 2010). This prompted us to examine whether similar  
540 interneuron deficits may be present in the brains of homozygous *Celsr3*<sup>R774H</sup> animals. We do  
541 not detect any significant loss of cortical parvalbumin or somatostatin interneurons (Fig. 2),  
542 nor do we see loss of striatal parvalbumin, somatostatin, or cholinergic interneurons (Fig. 4).  
543 In agreement, *Hdc* knockout mice, which have been used to model a familial stop-gain  
544 mutation identified in TD, have normal cortical layering and also do not show signs of  
545 parvalbumin or cholinergic interneuron loss in the cortex and/or striatum (Abdurakhmanova et  
546 al., 2017). Thus, our findings and those in *Hdc* knockout animals seem to suggest that striatal  
547 interneuron loss may be present only in rarer and more severe cases across the TD spectrum.

548  
549 Our findings in mice suggest human mutations in *CELSR3* may affect the ability of neurons to  
550 pattern their dendritic arborizations and receptive fields within CSTC loops (Fig. 3). Deep layer  
551 cortical pyramidal neurons in *Celsr3*<sup>R774H</sup> animals have atrophic basal dendrites, whereas  
552 striatal cholinergic interneurons tend to have more compact arborizations, with more crossings  
553 proximal to the soma (Fig. 5). The observation of dendritic patterning changes in cortical  
554 pyramidal neurons was an unexpected additional measure that hinged upon germline Cre,  
555 which has been previously reported (Luo et al., 2020). Reduced complexity of basal dendrites,  
556 however, is in line with previous findings from mice with conditional loss of *Celsr3* in *Dlx5/6-  
557 Cre:Celsr3*<sup>FLX/FLX</sup>:*Thy1-YFP* mice that showed “blunted” dendrites, and also dendritic spine  
558 loss in deep layer cortical pyramidal neurons using *Foxg1-Cre* (Zhou et al., 2010).  
559 Furthermore, hippocampal CA1 neurons also showed atrophic basal dendrites and loss of  
560 dendritic spines in *Celsr3*<sup>FLX/FLX</sup>:*Foxg1-Cre* mice (Feng et al., 2012). Our results suggest the  
561 *Celsr3*<sup>R774H</sup> amino acid substitution exerts partial loss-of-function effects on the protein. While  
562 we did not detect a significant reduction in overall spine density in cortical pyramidal neurons  
563 from *Celsr3*<sup>R774H</sup> animals (Fig. 3), we did detect a reduction in spine-like processes on the  
564 secondary dendrites of striatal cholinergic interneurons (Fig. 5). We also found changes to the  
565 types and distributions of dendritic spines along the secondary basal dendrite of cortical  
566 pyramidal neurons (Fig. 3), with a significant loss of stubby spines and a trend towards an  
567 increase in long-thin spines. This suggests *Celsr3* cadherin repeats are important for  
568 regulating the types and distributions of dendritic spines, and that spine maturity or spine  
569 turnover may be affected in TD. Examination of long-term potentiation capacity within both  
570 cortical pyramidal neurons and striatal cholinergic interneurons may reveal functional impacts  
571 that align with these anatomical observations.

572  
573 A recent study in rodents suggests cholinergic interneurons show a transient increase in  
574 dendritic complexity during the second postnatal week (McGuirt et al., 2021). This period is  
575 marked by overgrowth and increased number of crossings, followed by regression starting

576 around the third postnatal week. These findings are interesting because they are similar to  
577 those found in *Celsr3*<sup>R774H</sup> animals (Fig. 5), suggesting *Celsr3* has important functions for  
578 dendritic patterning at critical timepoints while cholinergic interneurons are differentiating.  
579 Increased lacunarity in *Celsr3*<sup>R774H/R774H</sup> cholinergic interneurons indicates higher levels of  
580 heterogeneity in the space-filling properties of their arbors. This could impact how cholinergic  
581 interneurons integrate within local striatal circuitry and also shift their electrotonic properties.  
582 In addition, we also find less filopodia spine-like appendages on the secondary dendrites of  
583 cholinergic interneurons, which normally possess only few spines (Fig. 5) (Poppi et al., 2021).  
584 Notably, studies have shown that *Celsr3* and PCP signalling is required for excitatory synapse  
585 formation in the hippocampus and cerebellum (Feng et al., 2012; Zhou et al., 2021). Thus,  
586 perhaps similar to mutations in cell adhesion proteins associated with related  
587 neurodevelopmental disorders such as autism spectrum disorder, human mutations in  
588 *CELSR3* may affect the ability of neurons within CSTC loops to pattern their receptive fields  
589 and to form and/or maintain functional synapses.

590  
591 TD is thought to involve dysregulated striatal dopamine signaling (Rapanelli et al., 2014;  
592 Singer et al., 2002; Wong et al., 2008), and drugs that act on D2 dopamine receptor signaling  
593 are still a mainstay treatment. Striatal dopamine and acetylcholine work in balance, where  
594 high dopamine and low acetylcholine striatal levels are generally associated with hyperkinesia,  
595 and conversely, low dopamine and high acetylcholine striatal levels are associated with gait  
596 freezing (Barbeau, 1962). Based on this “see-saw” theory and the idea that TD may align with  
597 a hyperdopaminergic striatal state, we hypothesized that cholinergic interneurons in  
598 *Celsr3*<sup>R774H/R774H</sup> mice would exhibit reduced intrinsic excitability. Surprisingly, we found the  
599 opposite. Though mild, *Celsr3*<sup>R774H/R774H</sup> cholinergic interneurons fire APs at a higher  
600 frequency than their littermate *Celsr3*<sup>+/+</sup> controls (Fig. 6), which could be due to either a subtle  
601 shift in intrinsic conductances that govern RMP, AP threshold, and AP discharge frequency,  
602 or a change in neurite patterning that alters their electrotonic properties (Mainen and  
603 Sejnowski, 1996). A more modern take on DA/ACh balance in the striatum is that it is a far  
604 more complex interplay with temporal and spatial dimensions (Surmeier and Graybiel, 2012).  
605 For instance, coordinated activity of striatal cholinergic interneurons elicits local DA release  
606 via excitation of nicotinic receptors on nigrostriatal axons (Cachope et al., 2012; Threlfell et  
607 al., 2012). Elevated AP frequency in *Celsr3*<sup>R774H/R774H</sup> cholinergic interneurons could reflect  
608 more nuanced changes in D2 and/or muscarinic M2 acetylcholine receptor intracellular  
609 signalling arising from changes to the local chemical milieu, and even a small change in  
610 cholinergic interneuron firing properties could have effects on tonic and phasic striatal  
611 dopamine signalling. These mechanisms are currently being investigated further in the  
612 *Celsr3*<sup>R774H</sup> model, as well as in mice carrying other mutations in *Celsr3*.

613

614 It is somewhat unexpected that *Celsr3*<sup>R774H</sup> animals exhibit only very mild changes to motor  
615 behavior, and do not show obvious tic-like stereotypies at baseline. In agreement, however,  
616 *Hdc* knock-out animals also do not show tic-like stereotypies at baseline without stress or  
617 amphetamine challenge (Castellan Baldan et al., 2014), consistent with findings that stress  
618 and sensory overload can exacerbate tics in humans. Moreover, targeted ablation of  
619 cholinergic or parvalbumin interneurons in the dorsal striatum, mimicking striatal interneuron  
620 loss found in some humans, only leads to tic-like stereotypies following acute stress or  
621 amphetamine challenge (Rapanelli et al., 2017b; Xu et al., 2015; Xu et al., 2016). Ablating  
622 ~50% of both populations simultaneously causes spontaneous stereotypies in males but not  
623 females (Rapanelli et al., 2017b), whereas more extensive loss of cholinergic interneurons  
624 can cause compulsive-like social behavior and repetitive digging (Martos et al., 2017). We  
625 also find that *Celsr3*<sup>R774H</sup> homozygous females, but not males, bury more marbles (Fig. 7),  
626 consistent with changes to compulsive or perseverative behaviors in response to  
627 environmentally driven stimuli. Interestingly, studies suggest that complex tics, which can  
628 reflect compulsions and are often performed in a ritualistic manner, are more common in  
629 females with TD versus males (Garris and Quigg, 2021; Hirschtritt et al., 2015). Thus, our  
630 genetic models may be useful for modelling sex-specific behavioral differences in TD. Finally,  
631 using motion sequencing to parse motor behavior into discrete modules, and computational  
632 approaches that use natural language processing to examine how short motion sequences  
633 are embedded into groupings, we detect subtle but distinct changes to action selection in  
634 *Celsr3*<sup>R774H</sup> animals (Fig. 7). This suggests the *Celsr3*<sup>R774H</sup> amino acid substitution exerts mild  
635 effects on motor functions that may become more apparent with stress, anxiety, or sensory  
636 overload. It will also be interesting to apply machine learning approaches that can analyze  
637 facial movements (Dolensek et al., 2020), as facial tics are more common in TD and may have  
638 been missed in our models.

639

640 In summary, our findings in *Celsr3*<sup>R774H</sup> animals point to subtle but detectable changes to the  
641 ability of neurons to pattern their receptive fields within CSTC loops, and also the ability of  
642 neurons in both the cortex and striatum to regulate the types and distributions of dendritic  
643 spines. This suggests that human mutations in *CELSR3* cause TD by affecting how neurons  
644 integrate and signal within CSTC circuits, rather than causing cell loss or other types of  
645 structural brain abnormalities. It will be important to confirm and extend our findings in other  
646 genetic models engineered to express mutations in different functional domains of *Celsr3*. It  
647 will also be interesting to compare neuronal and behavioral phenotypes with models  
648 engineered to express human mutations in *WWC1* and *OPA1*, work that is currently ongoing.

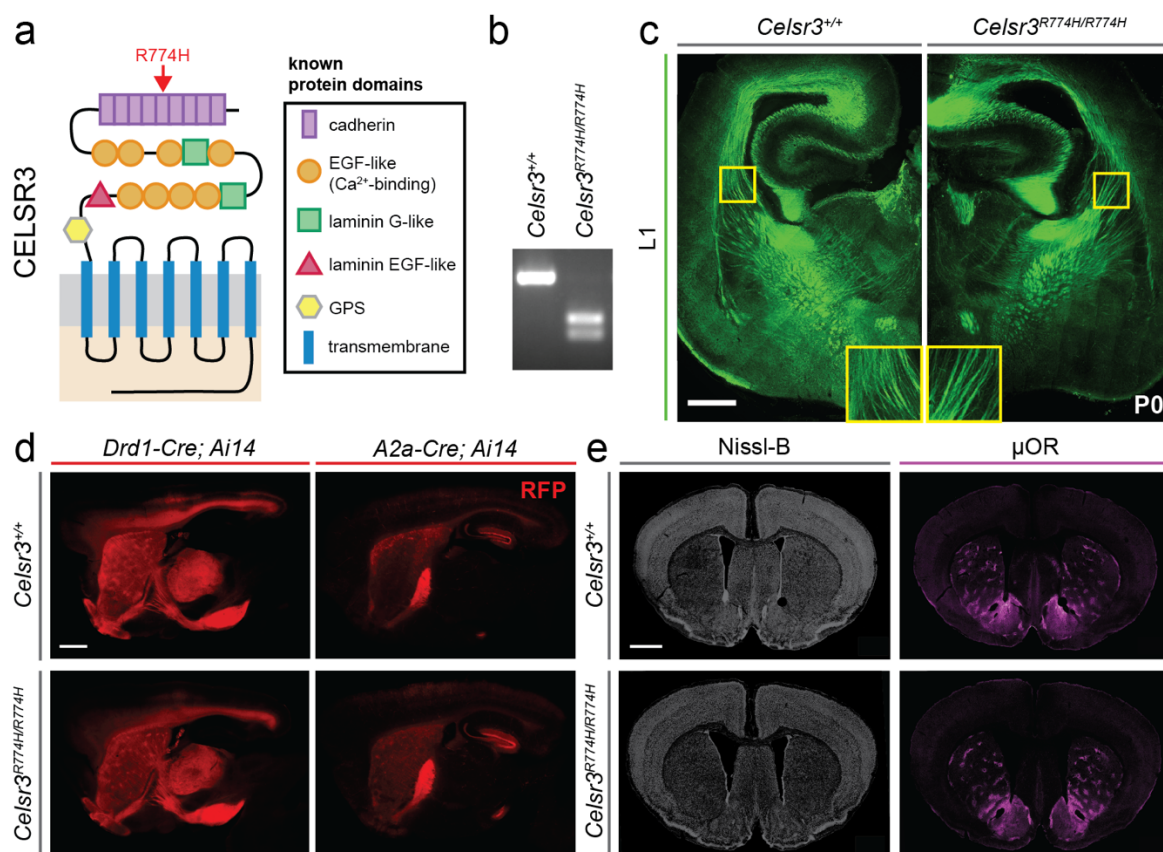

649

650 **Figure 1 | Homozygous point mutation in *Celsr3* does not perturb gross organization**

651 **of the mouse brain.** Known domains of CELSR3 protein and location of arginine to histidine

652 substitution (R774H, red arrow) within the fifth cadherin repeat (a). Genotyping bands for

653 *Celsr3*<sup>+/+</sup> (left) and *Celsr3*<sup>R774H/R774H</sup> (right; b). L1 antibody labelling in coronal sections of the

654 P0 mouse brain shows fiber tracts in *Celsr3*<sup>+/+</sup> (left) and *Celsr3*<sup>R774H/R774H</sup> (right) mice (c).

655 Scale bar represents 500 μm. Sagittal view of direct pathway axon tracts in adult *Celsr3*<sup>+/+</sup>

656 (top left) and *Celsr3*<sup>R774H/R774H</sup> (bottom left) based on *Ai14* expression under control of *Drd1*-

657 *Cre*. Sagittal view of indirect pathway fiber tracts in *Celsr3*<sup>+/+</sup> (top right) and *Celsr3*<sup>R774H/R774H</sup>

658 (bottom right) mice based on *Ai14* expression under control of *A2a*-*Cre* (d). Scale bar

659 represents 1 mm. Nissl-B labelling shows overall cell distribution in the coronal plane at a

660 mid-striatal position in *Celsr3*<sup>+/+</sup> (top left) and *Celsr3*<sup>R774H/R774H</sup> (bottom left) mice. μ-OR

661 antibody labelling shows striosomal patterning in coronal sections of *Celsr3*<sup>+/+</sup> (top right) and

662 *Celsr3*<sup>R774H/R774H</sup> (bottom right) striatum (e). Scale bar represents 1 mm.

663

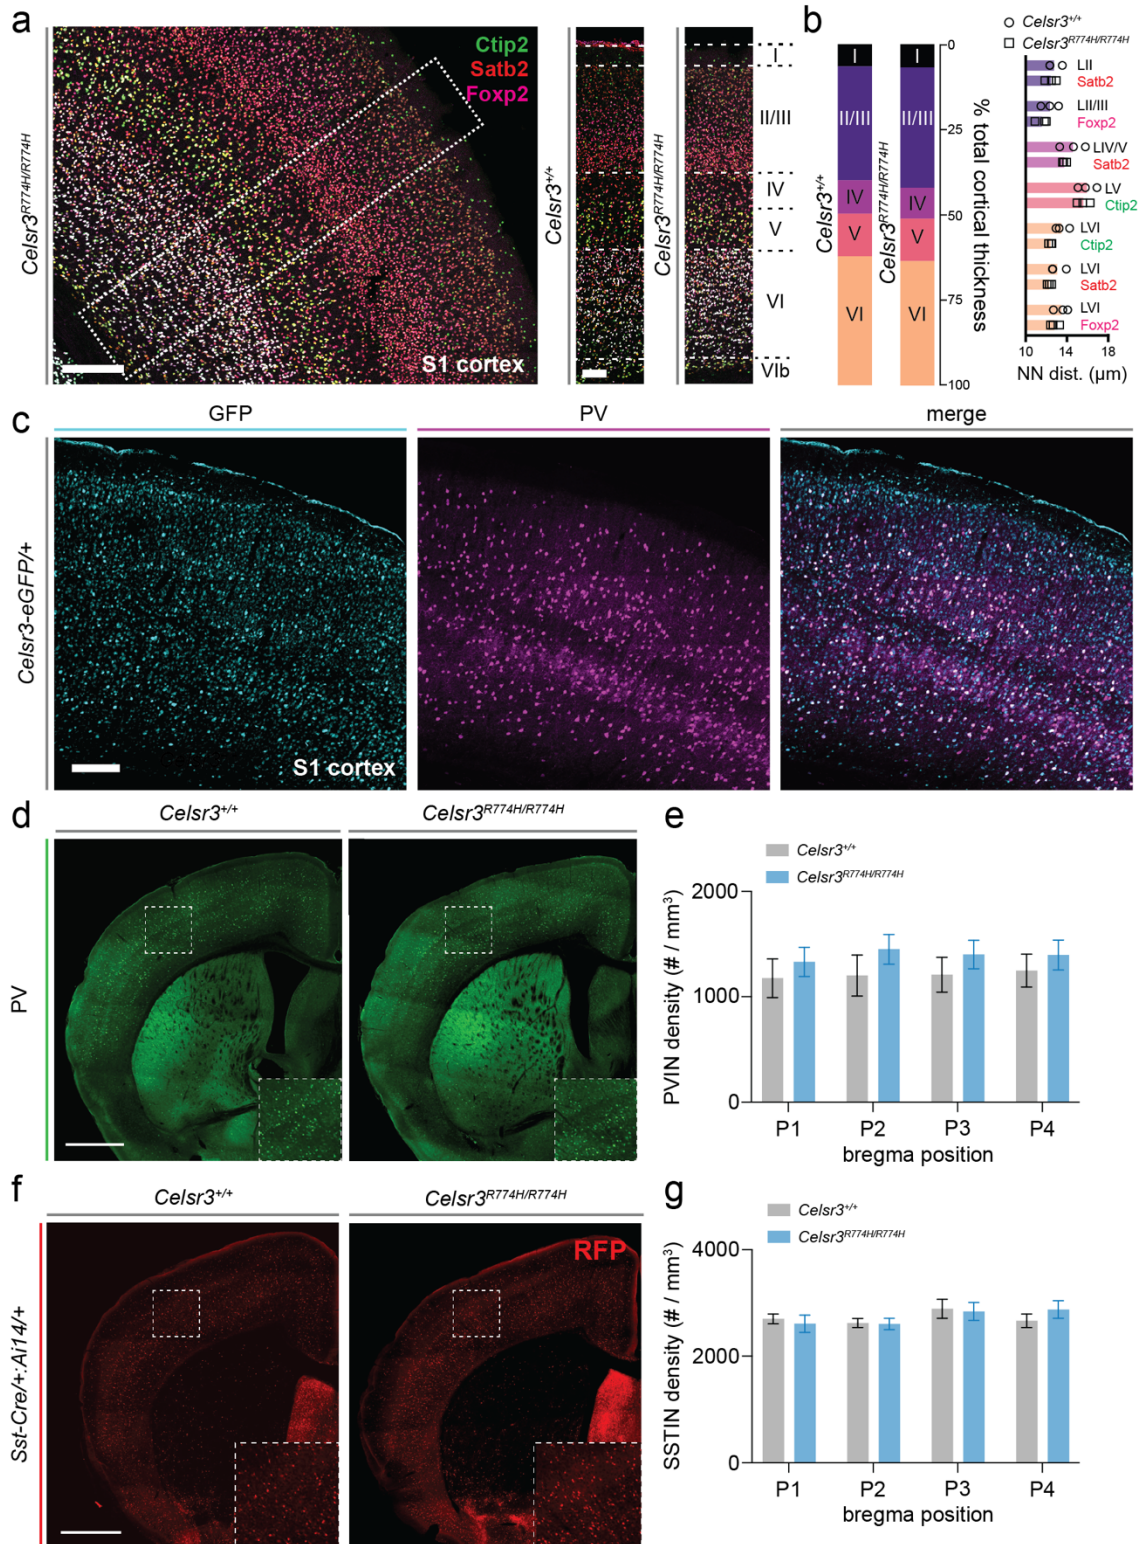

664

665 **Figure 2 | Cortical layering and inhibitory interneuron patterning is not significantly**  
 666 **impacted by the R774H amino acid substitution in Celsr3.** Representative image of  
 667 cortical layers in a *Celsr3*<sup>R774H/R774H</sup> mouse somatosensory (S1) cortex (large image, a).  
 668 Scale bar represents 200  $\mu$ m. Representative ROIs of *Celsr3*<sup>+/+</sup> and *Celsr3*<sup>R774H/R774H</sup> (smaller  
 669 images), with layer positions I-VI marked (a). Scale bar represents 100  $\mu$ m. Relative cortical  
 670 layer thickness in *Celsr3*<sup>+/+</sup> (left bar, n = 3) and *Celsr3*<sup>R774H/R774H</sup> (right bar, n = 3, p = 0.9742,

671 Chi-square test, b). Nearest neighbor distances across labelled populations within defined  
672 layers ( $p = 0.2275$ , 2way ANOVA, b). *Celsr3*-eGFP expression in mouse S1 cortex co-  
673 labelled for parvalbumin (PV, c). Scale bar represents 200  $\mu\text{m}$ . Representative images of  
674 cortical parvalbumin interneurons (PVINs) in *Celsr3*<sup>+/+</sup> (left) and *Celsr3*<sup>R774H/R774H</sup> (right) mice  
675 (d). Scale bar represents 1 mm. Comparison of cortical PVIN density at four different AP  
676 positions (*Celsr3*<sup>+/+</sup>  $n = 8$ , *Celsr3*<sup>R774H/R774H</sup>  $n = 7$ ,  $p = 0.4159$ , 2way ANOVA, e).  
677 Representative images of cortical somatostatin interneurons (SSTINs) in *Sst*-  
678 *Cre/+;Celsr3*<sup>+/+</sup>:*Ai14/+* (left) and *Sst-Cre/+;Celsr3*<sup>R774H/R774H</sup>:*Ai14/+* (right) mice (f). Scale bar  
679 represents 1 mm. Comparison of cortical SSTIN density at four different AP positions ( $p =$   
680  $0.8944$ , 2way ANOVA, g).

681

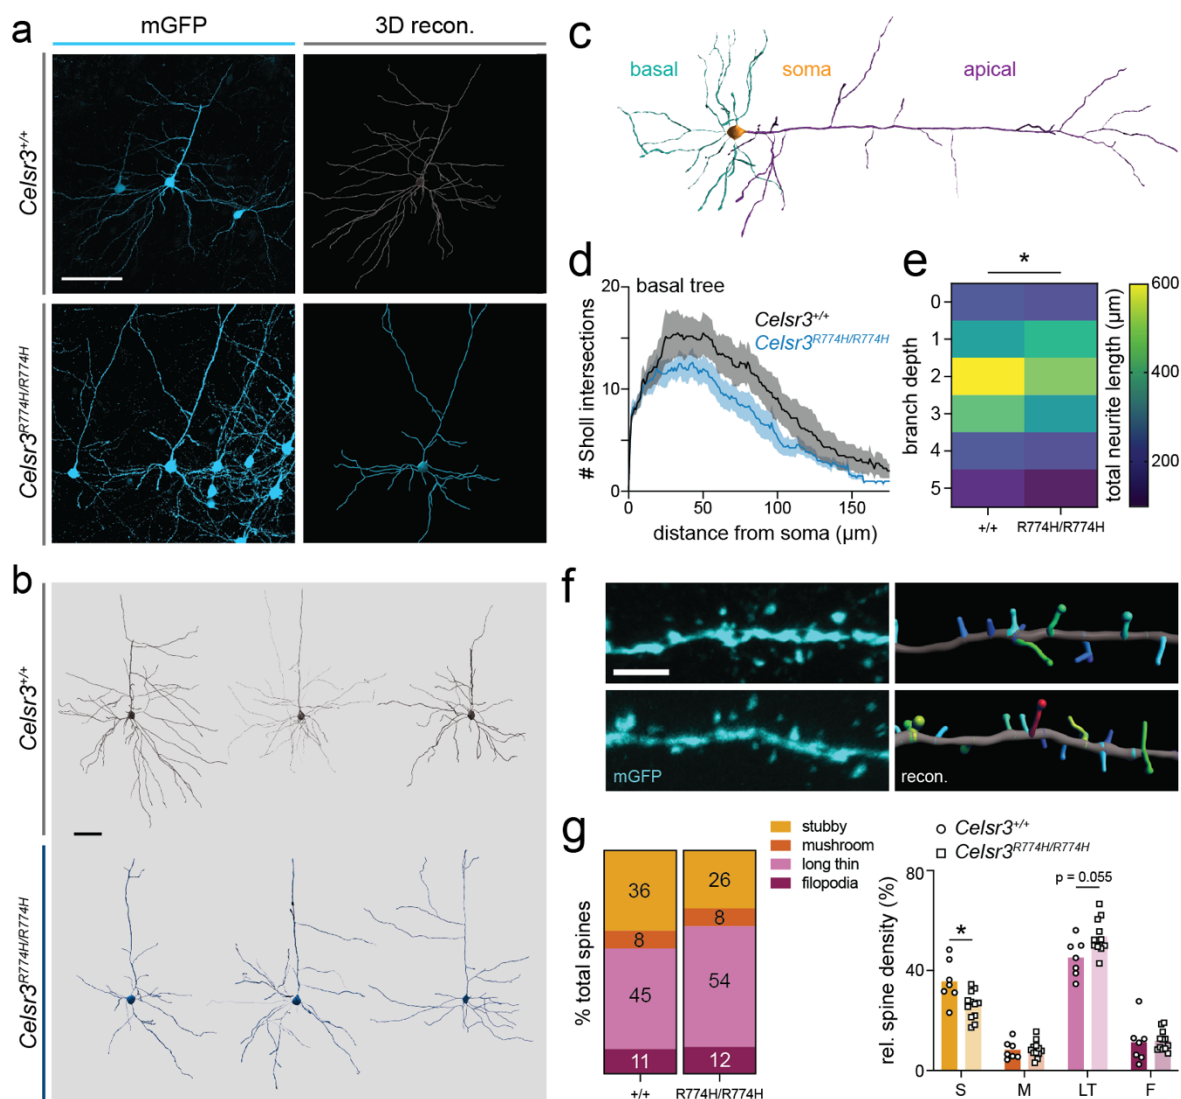

682

683 **Figure 3 | Basal dendrites of *Celsr3*-mutant cortical pyramidal neurons show reduced**

684 **complexity.** Representative images of confocal images (left) and their 3D reconstructions

685 (right, a). Scale bar represents 100 μm. Representative reconstructions of *Celsr3*<sup>+/+</sup> (top,

686 grey) and *Celsr3*<sup>R774H/R774H</sup> (bottom, blue) cortical pyramidal neurons (b). Scale bar

687 represents 50 μm. Schematic showing denotation of basal dendrites (blue) versus apical

688 dendrites (purple, c). Sholl analysis of *Celsr3*<sup>+/+</sup> (n = 6, black) and *Celsr3*<sup>R774H/R774H</sup> (n = 8,

689 blue) basal dendrites (genotype effect p < 0.001, 2way ANOVA, d). Shaded area represents

690 SEM. Heat map comparing total neurite length vs. branch depths (p = 0.0271, 2way ANOVA,

691 e). Representative confocal images of secondary dendrites (left) and their 3D reconstruction

692 and classification (right, f). Scale bar represents 2 μm. Relative spine density by class:

693 stubby (S), mushroom (M), long thin (LT) and filopodia (F) in *Celsr3*<sup>+/+</sup> and *Celsr3*<sup>R774H/R774H</sup>

694 mice (stubby spines p = 0.03, long thin spines p = 0.055, multiple Holm-Šidák t-test with

695 multiple comparison correction, g).

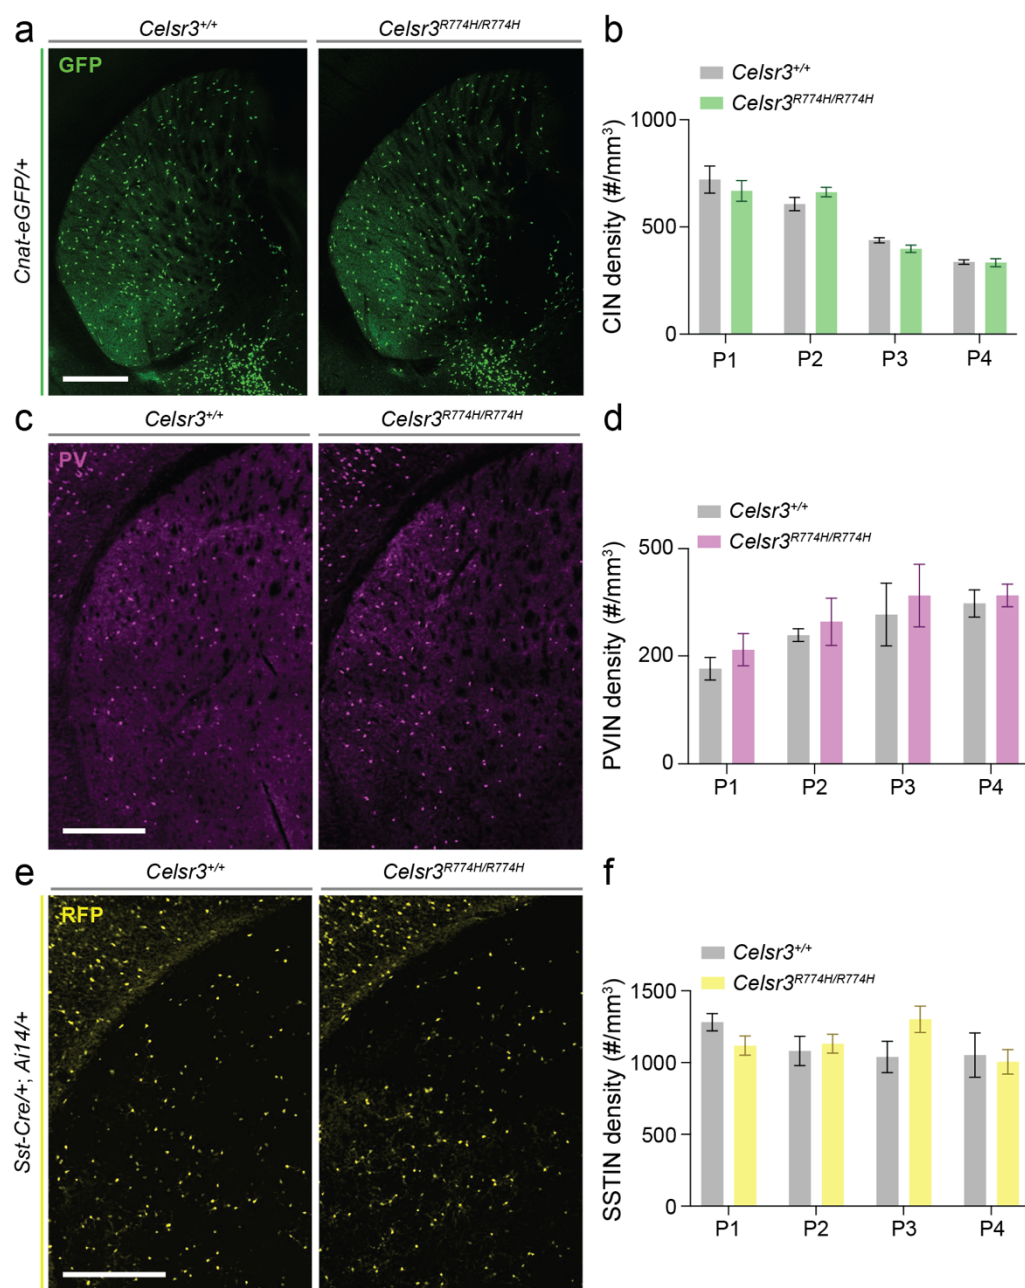

696  
697

698 **Figure 4 | *Celsr3*<sup>R774H</sup>-mutant mice have no detectable loss of cholinergic,**  
699 **parvalbumin-expressing, or somatostatin-expressing striatal interneurons.**

700 Representative images of *Celsr3*<sup>+/+</sup>; *Chat-eGFP* and *Celsr3*<sup>R774H/R774H</sup>; *Chat-eGFP* striatum  
701 (a). Density of GFP+ cholinergic interneurons (CINs) in *Celsr3*<sup>+/+</sup> (n = 7) and *Celsr3*<sup>R774H/R774H</sup>  
702 (n = 10) striatum at four axial positions (p = 0.6728, 2way ANOVA, b). Representative  
703 images of PV labelling in the striatum of *Celsr3*<sup>+/+</sup> and *Celsr3*<sup>R774H/R774H</sup> mice (c). Density of  
704 parvalbumin interneurons (PVINs) in the striatum at four axial positions (p = 0.3003, 2way  
705 ANOVA, d). Representative images of *Sst-Cre/+; Ai14/+; Celsr3*<sup>+/+</sup> and *Sst-Cre/+; Ai14/+;*  
706 *Celsr3*<sup>R774H/R774H</sup> striatum (e). Density of tdTomato+ somatostatin interneurons (SSTINs\_ in



707 the striatum of *Celsr3*<sup>+/+</sup> (n = 6) and *Celsr3*<sup>R774H/R774H</sup> (n = 5) mice at four axial positions (p =  
708 0.7279, 2way ANOVA, f). Scale bars represent 500 μm.

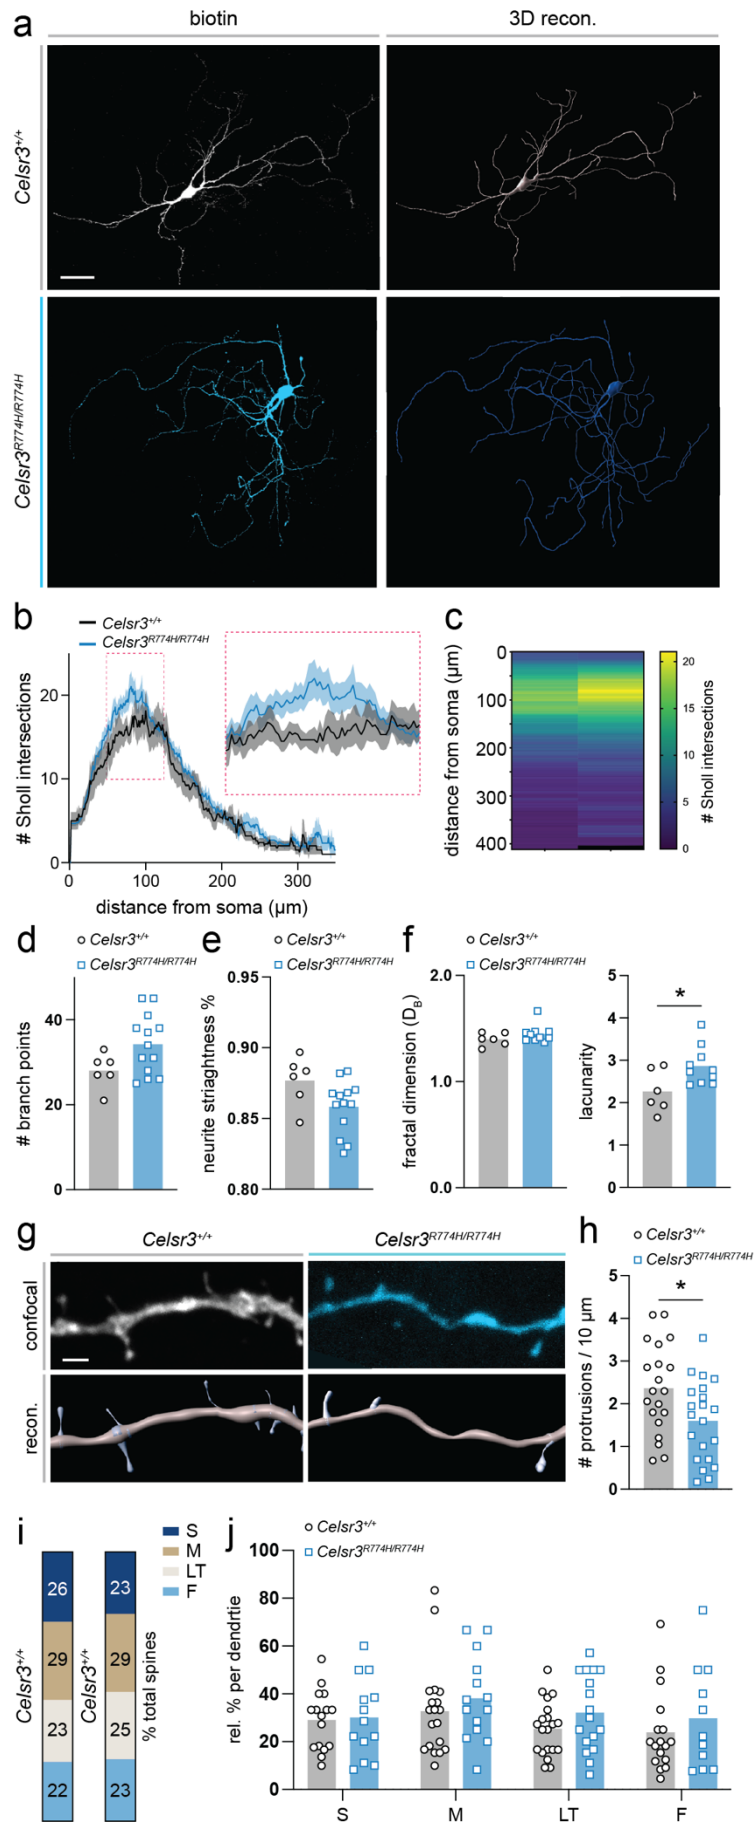

710 **Figure 5 | Increased neurite complexity and altered spine-like protrusions in striatal**  
711 **cholinergic interneurons of *Celsr3*<sup>R774H</sup>-mutant mice.** Representative images of confocal  
712 maximum intensity projections of biotin-filled neurons (left) and their 3D reconstructions (right)  
713 in *Celsr3*<sup>+/+</sup> (top) and *Celsr3*<sup>R774H/R774H</sup> (bottom) mice (a). Scale bar represents 50  $\mu$ m. Sholl  
714 analysis of *Celsr3*<sup>+/+</sup> (n = 6) and *Celsr3*<sup>R774H/R774H</sup> (n = 13) reconstructed neurons (genotype  
715 effect: p < 0.001, 2way ANOVA, b). Inset shows enlargement of Sholl plot ROI (magenta  
716 dotted box). Heat map of Sholl intersections vs. distance from soma in *Celsr3*<sup>+/+</sup> (left) and  
717 *Celsr3*<sup>R774H/R774H</sup> mice (right, c). Total number of branch points (p = 0.0619, t-test, d). Neurite  
718 straightness score (p = 0.0546, t-test, e). Fractal dimension (p = 0.2635, Mann-Whitney test,  
719 left) and lacunarity (p = 0.0379, t-test, right) measures (f). 3 neurons were excluded from the  
720 *Celsr3*<sup>R774H/R774H</sup> group for this particular analysis due to background pixels that interfered with  
721 Db and lacunarity scoring. Representative images of confocal maximum intensity projections  
722 of second order dendrite ROIs in *Celsr3*<sup>+/+</sup> (left, top) and *Celsr3*<sup>R774H/R774H</sup> (right, top) mice and  
723 their 3D reconstructions and semiautomatic spine detection (lower panels, g). Scale bar  
724 represents 2  $\mu$ m. Average spine density on second order dendrites (p = 0.0184, t-test, h).  
725 Relative contributions (%) of different spine classes on second order dendrites (S = stubby, M  
726 = mushroom, LT = long thin, F = filopodia). Relative contributions of spine classes shown per  
727 replicate (p = 0.0946, 2way ANOVA, j). Zero values were excluded.

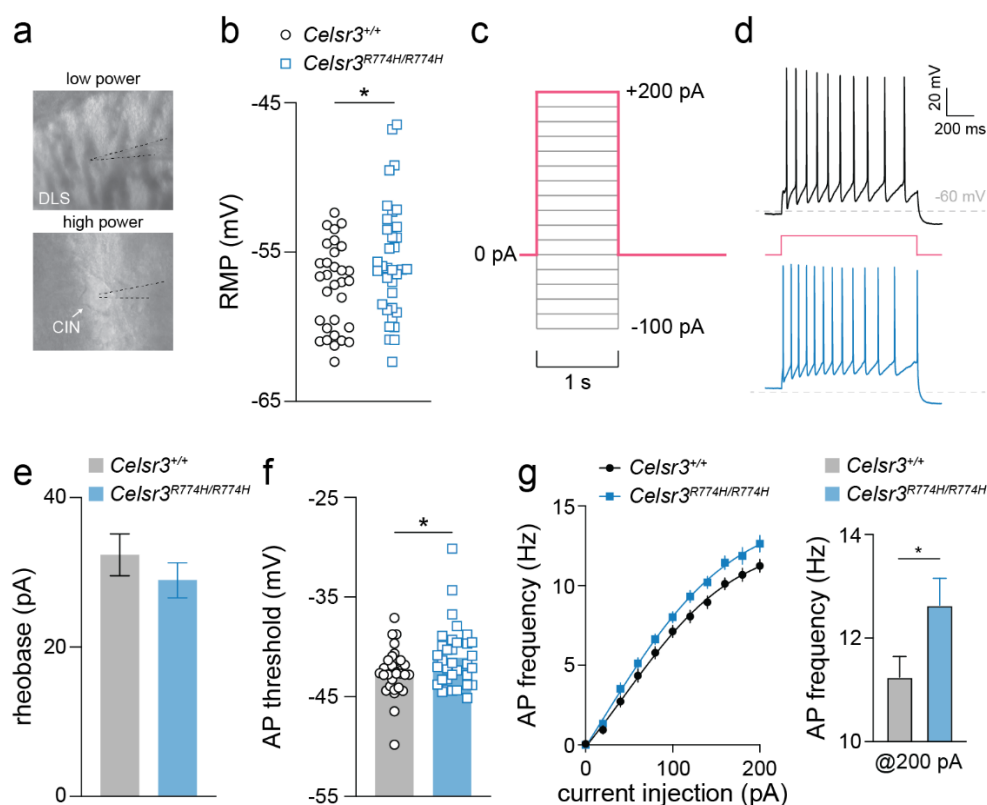

728

729

730 **Figure 6 | Striatal cholinergic interneurons of *Celsr3*<sup>R774H</sup>-mutant mice show mild**

731 **intrinsic hyperexcitability.** DIC images during recording at low power (top) show placement

732 of electrode in the dorsolateral striatum (DLS) and high power (bottom) showing placement of

733 electrode on an identified cholinergic interneuron (CIN) (a). Resting membrane potential (RMP)

734 of recorded *Celsr3*<sup>+/+</sup> (n = 31) and *Celsr3*<sup>R774H/R774H</sup> (n = 35) Cholinergic interneurons (p =

735 0.0386, two-tailed t-test, b). Depolarizing current injection ladder used to characterize evoked

736 action potentials in current clamp mode (c). Representative traces of a *Celsr3*<sup>+/+</sup> (top, black

737 trace) and a *Celsr3*<sup>R774H/R774H</sup> (lower, blue trace) tonically firing CIN in response to 200 pA

738 current injection (red step, d). Rheobase of *Celsr3*<sup>+/+</sup> and *Celsr3*<sup>R774H/R774H</sup> Cholinergic

739 interneurons (p = 0.3505, Mann-Whitney test, e). Action potential (AP) threshold of *Celsr3*<sup>+/+</sup>

740 and *Celsr3*<sup>R774H/R774H</sup> Cholinergic interneurons (p = 0.0456, unpaired t-test, f). f/I plot of

741 *Celsr3*<sup>+/+</sup> (n = 26) and *Celsr3*<sup>R774H/R774H</sup> Cholinergic interneurons (n = 19, left plot, p<0.0001,

742 nonlinear fit - different curve for each dataset). AP frequency @ 200 pA injection for *Celsr3*<sup>+/+</sup>

743 and *Celsr3*<sup>R774H/R774H</sup> Cholinergic interneurons (right graph, p = 0.0382, two-tailed t test).

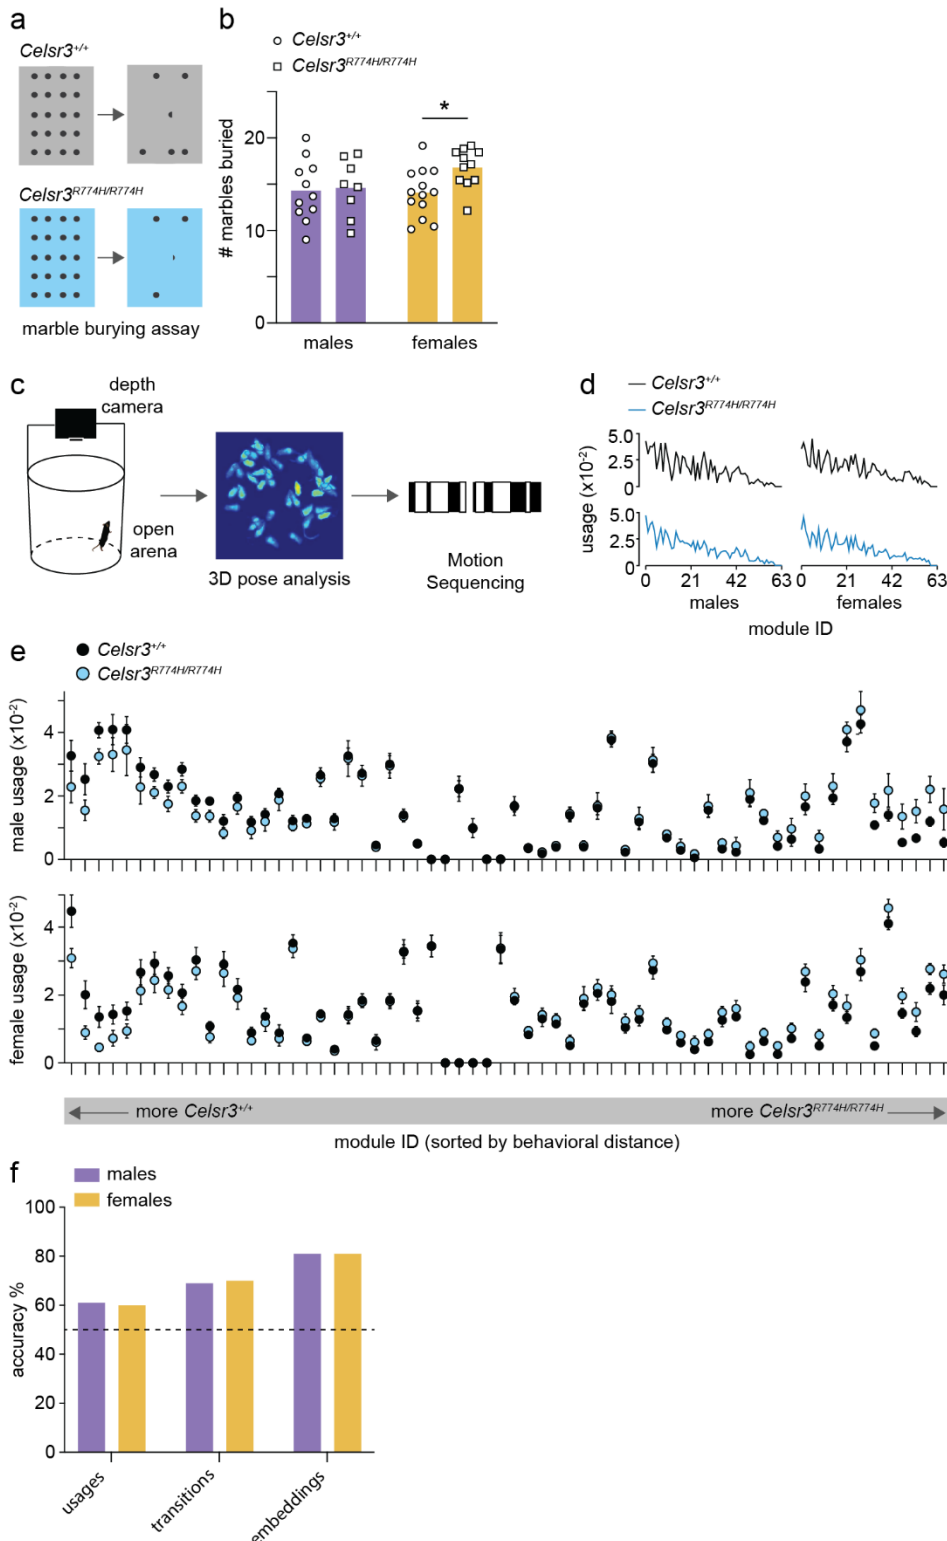

744

745 **Figure 7 | *Celsr3*<sup>R774H</sup>-mutant mice show perseverative tendencies and natural language**

746 **processing can predict genotype to 81% accuracy.** The marble burying assay consists of

747 20 glass marbles arranged in a 4 x 5 grid on top of 5 cm chip bedding (a). The average number

748 of marbles buried across three trials by *Celsr3*<sup>+/+</sup> and *Celsr3*<sup>R774H/R774H</sup> mice in 30 mins (b).

749 Female *Celsr3*<sup>R774H/R774H</sup> mice (n = 11) buried 16.66 +/- 0.64 marbles compared to *Celsr3*<sup>+/+</sup>

750 littermates (n = 13) who buried 13.92 +/- 0.72 marbles (p = 0.011, unpaired t-test; b). Mouse

751 behavior was recorded in an open arena with a depth camera, and behavioral features were  
752 sequenced using unsupervised machine learning (Motion Sequencing, c). Usage of  
753 behavioural modules (ordered 0-63) is similar when comparing across genotype in males (left  
754 graphs) and females (right graphs, d). Module usage with modules ordered by behavioral  
755 distance (left x-axis – *Celsr3*<sup>+/+</sup> usage tends to be higher, right x-axis – *Celsr3*<sup>R774H/R774H</sup> usage  
756 tends to be higher, e). A comparison of accuracy levels in predicting genotype (*Celsr3*<sup>+/+</sup>,  
757 *Celsr3*<sup>R774H/+</sup>, or *Celsr3*<sup>R774H/R774H</sup>) based on module usages, transitions between modules, and  
758 learned embeddings (f).

759 **Supplementary Table S1 – Mouse lines**

| Line name                     | Description/Use                                                                                                                                                                                                                                                                                    | Supplier                                               | Stock#           |
|-------------------------------|----------------------------------------------------------------------------------------------------------------------------------------------------------------------------------------------------------------------------------------------------------------------------------------------------|--------------------------------------------------------|------------------|
| <i>A2a-Cre</i>                | Cre recombinase expressed under control of <i>A2a</i> , used to visualize indirect pathway axons in mouse brain                                                                                                                                                                                    | MMRRC                                                  | 036158-UCD       |
| <i>Ai14</i>                   | Reporter line that expresses TdTomato in Cre recombinase expressing cells, used to visualize direct and indirect pathway axons when crossed with <i>Drd1-Cre</i> and <i>A2a-Cre</i> , respectively, and used to quantify density and nearest neighbor distribution of cortical and striatal SSTINs | JAX Mice                                               | 007914           |
| C57BL/6                       | Wild type inbred line used as a background strain, and for backcrossing + line refreshing                                                                                                                                                                                                          | JAX Mice                                               | 000664           |
| <i>Celsr3-eGFP</i>            | Knock-in eGFP line used to study <i>Celsr3</i> expression patterns in mouse brain                                                                                                                                                                                                                  | Mario Cappechi, University of Utah (Ying et al., 2009) | RRID:MGI:3849330 |
| <i>Celsr3<sup>R774H</sup></i> | Line carrying point mutation in <i>Celsr3</i> , used in all experiments                                                                                                                                                                                                                            | generated in house                                     | n/a              |
| <i>Chat-eGFP</i>              | BAC transgenic line expressing eGFP in cholinergic cells, used to quantify density of striatal Cholinergic interneurons + for targeted recordings in dorsolateral striatum                                                                                                                         | JAX Mice                                               | 007902           |
| <i>Drd1-Cre</i>               | Cre recombinase expressed under control of <i>Drd1</i> , used to visualize direct pathway axons in mouse brain                                                                                                                                                                                     | MMRRC                                                  | 030989-UCD       |
| <i>Pvalb-Cre</i>              | Cre recombinase expressed under control of <i>Pvalb</i> , used for off-target sparse cell labelling of layer V cortical neurons                                                                                                                                                                    | JAX Mice                                               | 012358           |
| <i>Sst-Cre</i>                | Cre recombinase expressed under control of <i>Sst</i> , used to quantify cortical + striatal SSTIN density                                                                                                                                                                                         | JAX Mice                                               | 028864           |

760

761 **Supplementary Table S2 – Criteria for spine classification**

| <b>Spine Class</b> | <b>Criteria</b>                                                          |
|--------------------|--------------------------------------------------------------------------|
| <b>Stubby</b>      | Spine length < 1 $\mu\text{m}$                                           |
| <b>Mushroom</b>    | Spine length < 3 $\mu\text{m}$ and spine head width > spine neck width*2 |
| <b>Long Thin</b>   | Spine head width $\geq$ spine neck width                                 |
| <b>Filopodia</b>   | True                                                                     |

762



763 **Supplementary Methods**

764 *Immunofluorescent labelling*

765 The typical protocol for immunofluorescent labelling consisted of 0.1 M PBS washes, followed  
766 by a 1-hour incubation in either normal donkey serum or normal goat serum, depending on  
767 the host species of secondary antibodies used. This was followed by incubation in primary  
768 antibody solution, washes in 0.1 M PBS, incubation in secondary antibody solution, washes  
769 in 0.1 M PBS, and finally mounting onto glass microscope slides (VWR) using Fluoromount-  
770 G mounting media (Southern Biotech). All anatomy data were acquired using confocal  
771 microscopy (Zeiss LSM 700 or Zeiss LSM 800) except for direct and indirect pathway  
772 visualization studies where data were collected on a Leica M165FC stereomicroscope with  
773 CoolLED illumination.

774

775 *Accelerated rotarod test*

776 The Rota-rod apparatus (LE8205, Panlab) was used to assess motor learning capabilities of  
777 mice. Mice were placed on the rod before the test started and the rod accelerated from 4 rpm  
778 to 40 rpm in 5 minutes. The duration of time that mice could stay on the rotating rod in each  
779 trial (latency) was recorded automatically. Mice were given at least 1 min recovery time  
780 between trials. During testing, the rod was kept dry and clean. Mice were tested for 5 trials per  
781 day over 6 consecutive days. The average of latency each mouse per day was plotted.

782

783 *SmartCage testing system*

784 SmartCage (AfaSci) equipped with base and upper layers of infrared (IR) beam arrays was  
785 used to analyze mouse locomotion. Mice were habituated for at least one hour with dim light.  
786 Mice were then placed in the homecage sized SmartCages and were left to freely behave for  
787 30 minutes. Mouse movement blocked the IR beams and signals were recorded automatically.  
788 Data were binned into 10-minute time blocks.

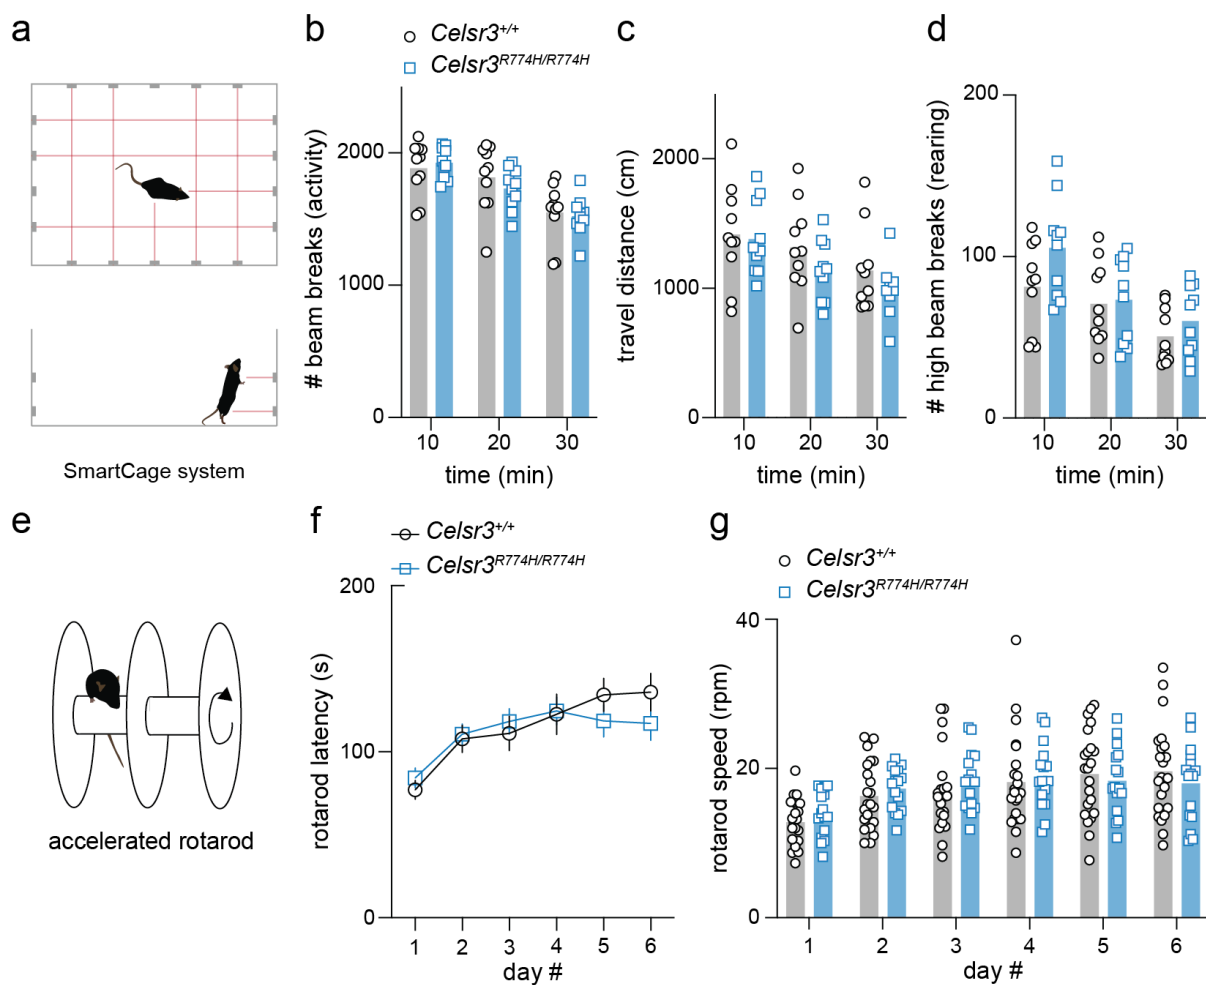

789

790 **Extended Data 1 | *Celsr3*<sup>R774H</sup>-mutant mice do not exhibit hyperactivity or motor learning**

791 **deficits.** Mice were placed in a SmartCage system fitted with a lower and upper IR beam

792 array to measure activity and rearing behavior (a). Total number of beam breaks within 10-

793 minute windows for *Celsr3*<sup>+/+</sup> (n = 10) and *Celsr3*<sup>R774H/R774H</sup> mice (n = 10, p = 0.6249, 2way

794 ANOVA, b). Total travel distance for *Celsr3*<sup>+/+</sup> and *Celsr3*<sup>R774H/R774H</sup> mice over 30 minutes (p =

795 0.1323, 2way ANOVA, c). Upper beam breaks (rearing activity) of *Celsr3*<sup>+/+</sup> and

796 *Celsr3*<sup>R774H/R774H</sup> mice (p = 0.0717, 2way ANOVA). Mice were assessed on an accelerated

797 rotarod test (e). Average latency to fall from rotarod vs. day of testing for *Celsr3*<sup>+/+</sup> (n = 20)

798 and *Celsr3*<sup>R774H/R774H</sup> mice (n = 18, p = 0.6300, 2way ANOVA) (f). Maximum rotarod speed

799 (revolutions per minute) vs day of test (p = 0.6760, 2way ANOVA, g).

800

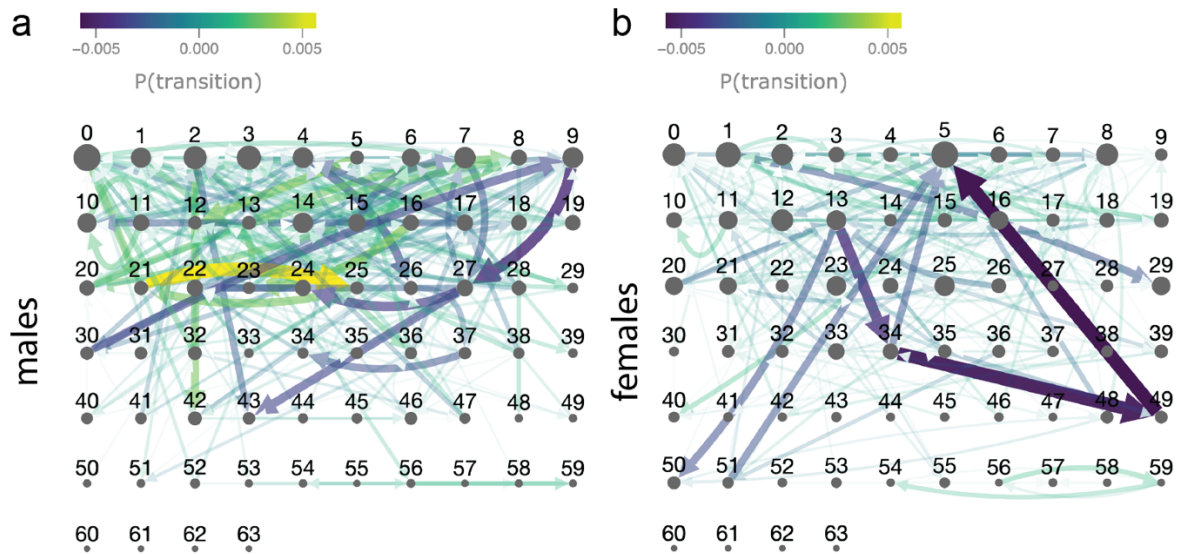

801

802 **Extended Data 2 | Altered probabilities of transitioning between behavioral modules in**

803 ***Celsr3*<sup>+/+</sup> and *Celsr3*<sup>R774H/R774H</sup> mice.** Transition probability matrix for *Celsr3*<sup>R774H/R774H</sup> males

804 (n = 8) relative to *Celsr3*<sup>+/+</sup> males (n = 12, a). Transition probability matrix for *Celsr3*<sup>R774H/R774H</sup>

805 females (n = 13) relative to *Celsr3*<sup>+/+</sup> females (n = 14). Pruning threshold was set to p = 0.0001.

806 Dot size is proportional to module usage.

807

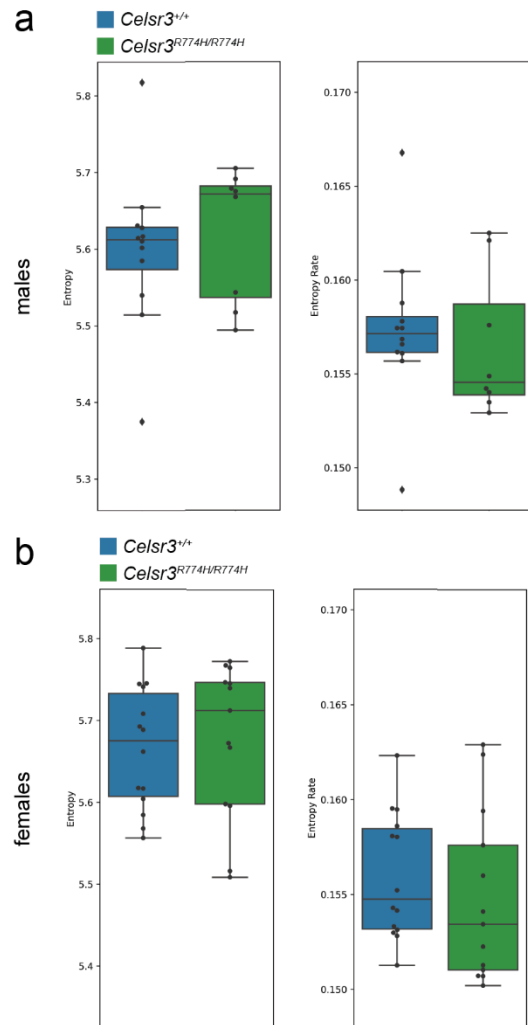

808  
809 **Extended Data 3 – Entropy plots for *Celsr3*<sup>+/+</sup> and *Celsr3*<sup>R774H/R774H</sup> mice.** Entropy plot (left)  
810 and entropy rate plot (right) for *Celsr3*<sup>+/+</sup> and *Celsr3*<sup>R774H/R774H</sup> males (a). Entropy plot (left) and  
811 entropy rate plot (right) for *Celsr3*<sup>+/+</sup> and *Celsr3*<sup>R774H/R774H</sup> females (b).  
812

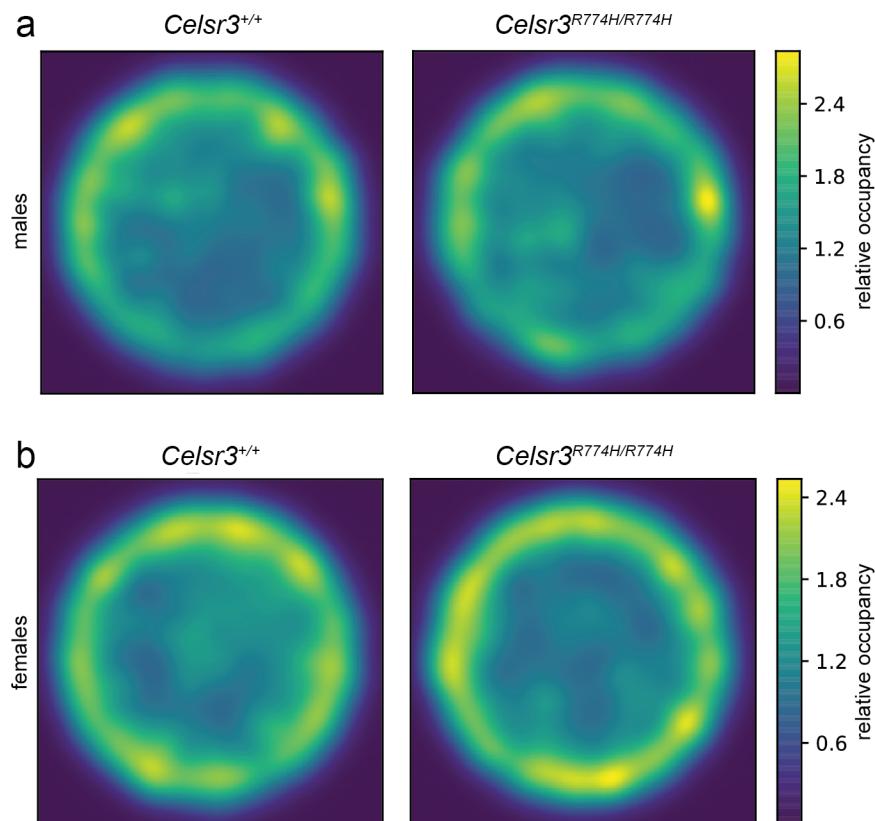

813  
814 **Extended Data 4 – Occupancy heat maps for *Celsr3*<sup>+/+</sup> and *Celsr3*<sup>R774H/R774H</sup> mice in open**  
815 **arena.** Relative occupancy heatmaps for *Celsr3*<sup>+/+</sup> and *Celsr3*<sup>R774H/R774H</sup> male mice (a).  
816 Relative occupancy heatmaps for *Celsr3*<sup>+/+</sup> and *Celsr3*<sup>R774H/R774H</sup> female mice (b).

817 **Funding**

818 This research was supported by grants from the National Institute of Mental Health  
819 (R01MH115958), the Tourette Association of America (grant held by M.A.T.), and the Robert  
820 Wood Johnson Foundation (#74260).

821

822 **Acknowledgements**

823 We would like to thank A.K. for their valuable contributions to the early stages of this study.

## 824 References

- 825 Abdurakhmanova, S., Chary, K., Kettunen, M., Sierra, A., Panula, P., 2017. Behavioral and  
826 stereological characterization of Hdc KO mice: Relation to Tourette syndrome. *J Comp*  
827 *Neurol* 525(16), 3476-3487.
- 828 Barbeau, A., 1962. The pathogenesis of Parkinson's disease: a new hypothesis. *Can Med*  
829 *Assoc J* 87, 802-807.
- 830 Bohic, M., Pattison, L.A., Jhumka, Z.A., Rossi, H., Thackray, J.K., Ricci, M., Foster, W.,  
831 Arnold, J., Mossazghi, N., Yttri, E.A., Tischfield, M.A., St. John Smith, E., Abdus-  
832 Saboor, I., Abaira, V.E., 2021. Behavioral and nociceptor states of inflammatory pain  
833 across timescales in 2D and 3D. *bioRxiv*.
- 834 Bronfeld, M., Yael, D., Belevsky, K., Bar-Gad, I., 2013. Motor tics evoked by striatal  
835 disinhibition in the rat. *Front Syst Neurosci* 7, 50.
- 836 Cachepe, R., Mateo, Y., Mathur, B.N., Irving, J., Wang, H.L., Morales, M., Lovinger, D.M.,  
837 Cheer, J.F., 2012. Selective activation of cholinergic interneurons enhances accumbal  
838 phasic dopamine release: setting the tone for reward processing. *Cell Rep* 2(1), 33-41.
- 839 Castellán Baldan, L., Williams, K.A., Gallezot, J.D., Pogorelov, V., Rapanelli, M., Crowley,  
840 M., Anderson, G.M., Loring, E., Gorczyca, R., Billingslea, E., Wasyluk, S., Panza,  
841 K.E., Ercan-Sencicek, A.G., Krusong, K., Leventhal, B.L., Ohtsu, H., Bloch, M.H.,  
842 Hughes, Z.A., Krystal, J.H., Mayes, L., de Araujo, I., Ding, Y.S., State, M.W., Pittenger,  
843 C., 2014. Histidine decarboxylase deficiency causes tourette syndrome: parallel  
844 findings in humans and mice. *Neuron* 81(1), 77-90.
- 845 de Oliveira, R.B., Graham, B., Howlett, M.C., Gravina, F.S., Oliveira, M.W., Imtiaz, M.S.,  
846 Callister, R.J., Lim, R., Brichta, A.M., van Helden, D.F., 2010. Ketamine anesthesia  
847 helps preserve neuronal viability. *J Neurosci Methods* 189(2), 230-232.
- 848 Dolensek, N., Gehrlach, D.A., Klein, A.S., Gogolla, N., 2020. Facial expressions of emotion  
849 states and their neuronal correlates in mice. *Science* 368(6486), 89-94.
- 850 Draper, A., Jackson, S.R., 2015. Alterations in structural connectivity may contribute both to  
851 the occurrence of tics in Gilles de la Tourette syndrome and to their subsequent  
852 control. *Brain* 138(Pt 2), 244-245.
- 853 Feng, J., Xu, Y., Wang, M., Ruan, Y., So, K.F., Tissir, F., Goffinet, A., Zhou, L., 2012. A role  
854 for atypical cadherin *Celsr3* in hippocampal maturation and connectivity. *J Neurosci*  
855 32(40), 13729-13743.
- 856 Franklin, K.B.J., Paxinos, G., 2012. Paxinos and Franklin's the Mouse Brain in Stereotaxic  
857 Coordinates, 4 ed. Academic Press.
- 858 Garris, J., Quigg, M., 2021. The female Tourette patient: Sex differences in Tourette  
859 Disorder. *Neurosci Biobehav Rev* 129, 261-268.
- 860 Gerard, E., Peterson, B.S., 2003. Developmental processes and brain imaging studies in  
861 Tourette syndrome. *J Psychosom Res* 55(1), 13-22.
- 862 Hartmann, A., Worbe, Y., 2018. Tourette syndrome: clinical spectrum, mechanisms and  
863 personalized treatments. *Curr Opin Neurol* 31(4), 504-509.
- 864 Hirschtritt, M.E., Lee, P.C., Pauls, D.L., Dion, Y., Grados, M.A., Illmann, C., King, R.A.,  
865 Sandor, P., McMahon, W.M., Lyon, G.J., Cath, D.C., Kurlan, R., Robertson, M.M.,  
866 Osiecki, L., Scharf, J.M., Mathews, C.A., Tourette Syndrome Association International  
867 Consortium for, G., 2015. Lifetime prevalence, age of risk, and genetic relationships of  
868 comorbid psychiatric disorders in Tourette syndrome. *JAMA Psychiatry* 72(4), 325-  
869 333.
- 870 Jackson, G.M., Draper, A., Dyke, K., Pepes, S.E., Jackson, S.R., 2015. Inhibition,  
871 Disinhibition, and the Control of Action in Tourette Syndrome. *Trends Cogn Sci* 19(11),  
872 655-665.
- 873 Jia, Z., Guo, Y., Tang, Y., Xu, Q., Li, B., Wu, Q., 2014. Regulation of the protocadherin  
874 *Celsr3* gene and its role in globus pallidus development and connectivity. *Mol Cell Biol*  
875 34(20), 3895-3910.
- 876 Kalanithi, P.S., Zheng, W., Kataoka, Y., DiFiglia, M., Grantz, H., Saper, C.B., Schwartz,  
877 M.L., Leckman, J.F., Vaccarino, F.M., 2005. Altered parvalbumin-positive neuron

- 878 distribution in basal ganglia of individuals with Tourette syndrome. *Proc Natl Acad Sci*  
879 *U S A* 102(37), 13307-13312.
- 880 Kataoka, Y., Kalanithi, P.S., Grantz, H., Schwartz, M.L., Saper, C., Leckman, J.F.,  
881 Vaccarino, F.M., 2010. Decreased number of parvalbumin and cholinergic  
882 interneurons in the striatum of individuals with Tourette syndrome. *J Comp Neurol*  
883 518(3), 277-291.
- 884 Kuo, H.Y., Liu, F.C., 2019. Synaptic Wiring of Corticostriatal Circuits in Basal Ganglia:  
885 Insights into the Pathogenesis of Neuropsychiatric Disorders. *eNeuro* 6(3).
- 886 Leckman, J.F., Bloch, M.H., Scahill, L., King, R.A., 2006. Tourette syndrome: the self under  
887 siege. *J Child Neurol* 21(8), 642-649.
- 888 Lin, R., Wang, R., Yuan, J., Feng, Q., Zhou, Y., Zeng, S., Ren, M., Jiang, S., Ni, H., Zhou,  
889 C., Gong, H., Luo, M., 2018. Cell-type-specific and projection-specific brain-wide  
890 reconstruction of single neurons. *Nat Methods* 15(12), 1033-1036.
- 891 Luo, L., Ambrozkiwicz, M.C., Benseler, F., Chen, C., Dumontier, E., Falkner, S., Furlanis,  
892 E., Gomez, A.M., Hoshina, N., Huang, W.H., Hutchison, M.A., Itoh-Maruoaka, Y.,  
893 Lavery, L.A., Li, W., Maruo, T., Motohashi, J., Pai, E.L., Pelkey, K.A., Pereira, A.,  
894 Philips, T., Sinclair, J.L., Stogsdill, J.A., Traunmuller, L., Wang, J., Wortel, J., You, W.,  
895 Abumaria, N., Beier, K.T., Brose, N., Burgess, H.A., Cepko, C.L., Cloutier, J.F., Eroglu,  
896 C., Goebbels, S., Kaeser, P.S., Kay, J.N., Lu, W., Luo, L., Mandai, K., McBain, C.J.,  
897 Nave, K.A., Prado, M.A.M., Prado, V.F., Rothstein, J., Rubenstein, J.L.R., Saher, G.,  
898 Sakimura, K., Sanes, J.R., Scheiffele, P., Takai, Y., Umemori, H., Verhage, M., Yuzaki,  
899 M., Zoghbi, H.Y., Kawabe, H., Craig, A.M., 2020. Optimizing Nervous System-Specific  
900 Gene Targeting with Cre Driver Lines: Prevalence of Germline Recombination and  
901 Influencing Factors. *Neuron* 106(1), 37-65 e35.
- 902 Mainen, Z.F., Sejnowski, T.J., 1996. Influence of dendritic structure on firing pattern in model  
903 neocortical neurons. *Nature* 382(6589), 363-366.
- 904 Markowitz, J.E., Gillis, W.F., Beron, C.C., Neufeld, S.Q., Robertson, K., Bhagat, N.D.,  
905 Peterson, R.E., Peterson, E., Hyun, M., Linderman, S.W., Sabatini, B.L., Datta, S.R.,  
906 2018. The Striatum Organizes 3D Behavior via Moment-to-Moment Action Selection.  
907 *Cell* 174(1), 44-58 e17.
- 908 Martos, Y.V., Braz, B.Y., Beccaria, J.P., Murer, M.G., Belforte, J.E., 2017. Compulsive  
909 Social Behavior Emerges after Selective Ablation of Striatal Cholinergic Interneurons.  
910 *J Neurosci* 37(11), 2849-2858.
- 911 McCairn, K.W., Bronfeld, M., Belevsky, K., Bar-Gad, I., 2009. The neurophysiological  
912 correlates of motor tics following focal striatal disinhibition. *Brain* 132(Pt 8), 2125-2138.
- 913 McCairn, K.W., Nagai, Y., Hori, Y., Ninomiya, T., Kikuchi, E., Lee, J.Y., Suhara, T., Iriki, A.,  
914 Minamimoto, T., Takada, M., Isoda, M., Matsumoto, M., 2016. A Primary Role for  
915 Nucleus Accumbens and Related Limbic Network in Vocal Tics. *Neuron* 89(2), 300-  
916 307.
- 917 McGuirt, A.F., Post, M.R., Pigulevskiy, I., Sulzer, D., Lieberman, O.J., 2021. Coordinated  
918 Postnatal Maturation of Striatal Cholinergic Interneurons and Dopamine Release  
919 Dynamics in Mice. *J Neurosci* 41(16), 3597-3609.
- 920 Peterson, B.S., Thomas, P., Kane, M.J., Scahill, L., Zhang, H., Bronen, R., King, R.A.,  
921 Leckman, J.F., Staib, L., 2003. Basal Ganglia volumes in patients with Gilles de la  
922 Tourette syndrome. *Arch Gen Psychiatry* 60(4), 415-424.
- 923 Poppi, L.A., Ho-Nguyen, K.T., Shi, A., Daut, C.T., Tischfield, M.A., 2021. Recurrent  
924 Implication of Striatal Cholinergic Interneurons in a Range of Neurodevelopmental,  
925 Neurodegenerative, and Neuropsychiatric Disorders. *Cells* 10(4).
- 926 Rapanelli, M., Frick, L.R., Pittenger, C., 2017a. The Role of Interneurons in Autism and  
927 Tourette Syndrome. *Trends Neurosci* 40(7), 397-407.
- 928 Rapanelli, M., Frick, L.R., Pogorelov, V., Ota, K.T., Abbasi, E., Ohtsu, H., Pittenger, C.,  
929 2014. Dysregulated intracellular signaling in the striatum in a pathophysiologically  
930 grounded model of Tourette syndrome. *Eur Neuropsychopharmacol* 24(12), 1896-  
931 1906.



- 932 Rapanelli, M., Frick, L.R., Xu, M., Groman, S.M., Jindachomthong, K., Tamamaki, N.,  
933 Tanahira, C., Taylor, J.R., Pittenger, C., 2017b. Targeted Interneuron Depletion in the  
934 Dorsal Striatum Produces Autism-like Behavioral Abnormalities in Male but Not  
935 Female Mice. *Biol Psychiatry* 82(3), 194-203.
- 936 Robertson, M.M., 2015. A personal 35 year perspective on Gilles de la Tourette syndrome:  
937 prevalence, phenomenology, comorbidities, and coexistent psychopathologies. *Lancet*  
938 *Psychiatry* 2(1), 68-87.
- 939 Roweis, S.T., 1998. EM algorithms for PCA and SPCA, *Advances in neural information*  
940 *processing systems*.
- 941 Scharf, J.M., Miller, L.L., Gauvin, C.A., Alabiso, J., Mathews, C.A., Ben-Shlomo, Y., 2015.  
942 Population prevalence of Tourette syndrome: a systematic review and meta-analysis.  
943 *Mov Disord* 30(2), 221-228.
- 944 Singer, H.S., Szymanski, S., Giuliano, J., Yokoi, F., Dogan, A.S., Brasic, J.R., Zhou, Y.,  
945 Grace, A.A., Wong, D.F., 2002. Elevated intrasynaptic dopamine release in Tourette's  
946 syndrome measured by PET. *Am J Psychiatry* 159(8), 1329-1336.
- 947 Surmeier, D.J., Graybiel, A.M., 2012. A feud that wasn't: acetylcholine evokes dopamine  
948 release in the striatum. *Neuron* 75(1), 1-3.
- 949 Threlfell, S., Lalic, T., Platt, N.J., Jennings, K.A., Deisseroth, K., Cragg, S.J., 2012. Striatal  
950 dopamine release is triggered by synchronized activity in cholinergic interneurons.  
951 *Neuron* 75(1), 58-64.
- 952 Tipping, M.E., Bishop, C.M., 1999. Probabilistic principal component analysis. *Journal of the*  
953 *Royal Statistical Society: Series B (Statistical Methodology)* 61, 611-622.
- 954 Tissir, F., Bar, I., Jossin, Y., De Backer, O., Goffinet, A.M., 2005. Protocadherin *Celsr3* is  
955 crucial in axonal tract development. *Nat Neurosci* 8(4), 451-457.
- 956 Tissir, F., Goffinet, A.M., 2006. Expression of planar cell polarity genes during development  
957 of the mouse CNS. *Eur J Neurosci* 23(3), 597-607.
- 958 Wang, S., Mandell, J.D., Kumar, Y., Sun, N., Morris, M.T., Arbelaez, J., Nasello, C., Dong,  
959 S., Duhn, C., Zhao, X., Yang, Z., Padmanabhuni, S.S., Yu, D., King, R.A., Dietrich, A.,  
960 Khalifa, N., Dahl, N., Huang, A.Y., Neale, B.M., Coppola, G., Mathews, C.A., Scharf,  
961 J.M., Tourette International Collaborative Genetics, S., Tourette Syndrome Genetics,  
962 S., Eastern Europe, I., Tourette Association of America International Consortium for,  
963 G., Fernandez, T.V., Buxbaum, J.D., De Rubeis, S., Grice, D.E., Xing, J., Heiman,  
964 G.A., Tischfield, J.A., Paschou, P., Willsey, A.J., State, M.W., 2018. De Novo  
965 Sequence and Copy Number Variants Are Strongly Associated with Tourette Disorder  
966 and Implicate Cell Polarity in Pathogenesis. *Cell Rep* 25(12), 3544.
- 967 Wang, Z., Maia, T.V., Marsh, R., Colibazzi, T., Gerber, A., Peterson, B.S., 2011. The neural  
968 circuits that generate tics in Tourette's syndrome. *Am J Psychiatry* 168(12), 1326-  
969 1337.
- 970 Willsey, A.J., Fernandez, T.V., Yu, D., King, R.A., Dietrich, A., Xing, J., Sanders, S.J.,  
971 Mandell, J.D., Huang, A.Y., Richer, P., Smith, L., Dong, S., Samocha, K.E., Tourette  
972 International Collaborative, G., Tourette Syndrome Association International  
973 Consortium for, G., Neale, B.M., Coppola, G., Mathews, C.A., Tischfield, J.A., Scharf,  
974 J.M., State, M.W., Heiman, G.A., 2017. De Novo Coding Variants Are Strongly  
975 Associated with Tourette Disorder. *Neuron* 94(3), 486-499 e489.
- 976 Willsey, A.J., Morris, M.T., Wang, S., Willsey, H.R., Sun, N., Teerikorpi, N., Baum, T.B.,  
977 Cagney, G., Bender, K.J., Desai, T.A., Srivastava, D., Davis, G.W., Doudna, J.,  
978 Chang, E., Sohal, V., Lowenstein, D.H., Li, H., Agard, D., Keiser, M.J., Shoichet, B.,  
979 von Zastrow, M., Mucke, L., Finkbeiner, S., Gan, L., Sestan, N., Ward, M.E.,  
980 Huttenhain, R., Nowakowski, T.J., Bellen, H.J., Frank, L.M., Khokha, M.K., Lifton, R.P.,  
981 Kampmann, M., Ideker, T., State, M.W., Krogan, N.J., 2018. The Psychiatric Cell Map  
982 Initiative: A Convergent Systems Biological Approach to Illuminating Key Molecular  
983 Pathways in Neuropsychiatric Disorders. *Cell* 174(3), 505-520.
- 984 Wiltschko, A.B., Johnson, M.J., Iurilli, G., Peterson, R.E., Katon, J.M., Pashkovski, S.L.,  
985 Abaira, V.E., Adams, R.P., Datta, S.R., 2015. Mapping Sub-Second Structure in  
986 Mouse Behavior. *Neuron* 88(6), 1121-1135.

- 987 Wong, D.F., Brasic, J.R., Singer, H.S., Schretlen, D.J., Kuwabara, H., Zhou, Y., Nandi, A.,  
988 Maris, M.A., Alexander, M., Ye, W., Rousset, O., Kumar, A., Szabo, Z., Gjedde, A.,  
989 Grace, A.A., 2008. Mechanisms of dopaminergic and serotonergic neurotransmission  
990 in Tourette syndrome: clues from an in vivo neurochemistry study with PET.  
991 *Neuropsychopharmacology* 33(6), 1239-1251.
- 992 Worbe, Y., Baup, N., Grabli, D., Chaigneau, M., Mounayar, S., McCairn, K., Feger, J.,  
993 Tremblay, L., 2009. Behavioral and movement disorders induced by local inhibitory  
994 dysfunction in primate striatum. *Cereb Cortex* 19(8), 1844-1856.
- 995 Worbe, Y., Malherbe, C., Hartmann, A., Pelegrini-Issac, M., Messe, A., Vidailhet, M.,  
996 Lehericy, S., Benali, H., 2012. Functional immaturity of cortico-basal ganglia networks  
997 in Gilles de la Tourette syndrome. *Brain* 135(Pt 6), 1937-1946.
- 998 Xu, M., Kobets, A., Du, J.C., Lenington, J., Li, L., Banasr, M., Duman, R.S., Vaccarino,  
999 F.M., DiLeone, R.J., Pittenger, C., 2015. Targeted ablation of cholinergic interneurons  
1000 in the dorsolateral striatum produces behavioral manifestations of Tourette syndrome.  
1001 *Proc Natl Acad Sci U S A* 112(3), 893-898.
- 1002 Xu, M., Li, L., Pittenger, C., 2016. Ablation of fast-spiking interneurons in the dorsal striatum,  
1003 recapitulating abnormalities seen post-mortem in Tourette syndrome, produces anxiety  
1004 and elevated grooming. *Neuroscience* 324, 321-329.
- 1005 Ying, G., Wu, S., Hou, R., Huang, W., Capecchi, M.R., Wu, Q., 2009. The protocadherin  
1006 gene *Celsr3* is required for interneuron migration in the mouse forebrain. *Mol Cell Biol*  
1007 29(11), 3045-3061.
- 1008 Zhou, L., Bar, I., Achouri, Y., Campbell, K., De Backer, O., Hebert, J.M., Jones, K., Kessar, N.,  
1009 de Rouvroit, C.L., O'Leary, D., Richardson, W.D., Goffinet, A.M., Tissir, F., 2008.  
1010 Early forebrain wiring: genetic dissection using conditional *Celsr3* mutant mice.  
1011 *Science* 320(5878), 946-949.
- 1012 Zhou, L., Gall, D., Qu, Y., Prigogine, C., Cheron, G., Tissir, F., Schiffmann, S.N., Goffinet,  
1013 A.M., 2010. Maturation of "neocortex isolé" in vivo in mice. *J Neurosci* 30(23), 7928-  
1014 7939.
- 1015 Zhou, Q., Qin, J., Liang, Y., Zhang, W., He, S., Tissir, F., Qu, Y., Zhou, L., 2021. *Celsr3* is  
1016 required for Purkinje cell maturation and regulates cerebellar postsynaptic plasticity.  
1017 *iScience* 24(7), 102812.
- 1018
